# Supplementary material for: Association of Vegetarian and Vegan Diets with Cardiovascular Health: An Umbrella Review of Meta-Analysis of Observational Studies and Randomized Trials
Source: MDPI journal article supplement (doi:10.3390/nu15194103), 2023-09-22
Supplement: s1 [file s1]

## Supplementary material

**Table S1** Search strategies.

The filter for systematic review and meta-analysis was applied based on the filters available for systematic reviews, meta-analyses, health technology assessments and indirect treatment comparisons

([https://searchfilters.cadth.ca/list?q=&ps=20&topic\\_facet=health%20technology%20assessments%200000%7CHHealth%20technology%20assessments&p=1](https://searchfilters.cadth.ca/list?q=&ps=20&topic_facet=health%20technology%20assessments%200000%7CHHealth%20technology%20assessments&p=1)) [1–4].

|        |                                                                                                                                                                                                                                                                                                                                                                                                                                                                                                                                                                                                                                                                                                                                                                                                                                                                                                                                                                                                                                                                                                                                                                                                                                                                                                                                                                                                                                                                                                                                                                                                                                                                                                                                                                                                                                                                                                                                                                                                                                                                                                                                                                                                                                                                                                                                                                                                                                                                                                                                                                                                                                                                                                                                                                                                                                                                                                                                                                                                                                                                                                                                                                                                                                                                                                                   |
|--------|-------------------------------------------------------------------------------------------------------------------------------------------------------------------------------------------------------------------------------------------------------------------------------------------------------------------------------------------------------------------------------------------------------------------------------------------------------------------------------------------------------------------------------------------------------------------------------------------------------------------------------------------------------------------------------------------------------------------------------------------------------------------------------------------------------------------------------------------------------------------------------------------------------------------------------------------------------------------------------------------------------------------------------------------------------------------------------------------------------------------------------------------------------------------------------------------------------------------------------------------------------------------------------------------------------------------------------------------------------------------------------------------------------------------------------------------------------------------------------------------------------------------------------------------------------------------------------------------------------------------------------------------------------------------------------------------------------------------------------------------------------------------------------------------------------------------------------------------------------------------------------------------------------------------------------------------------------------------------------------------------------------------------------------------------------------------------------------------------------------------------------------------------------------------------------------------------------------------------------------------------------------------------------------------------------------------------------------------------------------------------------------------------------------------------------------------------------------------------------------------------------------------------------------------------------------------------------------------------------------------------------------------------------------------------------------------------------------------------------------------------------------------------------------------------------------------------------------------------------------------------------------------------------------------------------------------------------------------------------------------------------------------------------------------------------------------------------------------------------------------------------------------------------------------------------------------------------------------------------------------------------------------------------------------------------------------|
| PubMed | ("myocardial ischemia"[MeSH Terms] OR "myocardial ischaemia"[Title/Abstract] OR "ischemia myocardial"[Title/Abstract] OR "ischemias myocardial"[Title/Abstract] OR "Myocardial Ischemias"[Title/Abstract] OR "Ischemic Heart Disease"[Title/Abstract] OR "heart disease ischemic"[Title/Abstract] OR "disease ischemic heart"[Title/Abstract] OR "diseases ischemic heart"[Title/Abstract] OR "heart diseases ischemic"[Title/Abstract] OR "Ischemic Heart Diseases"[Title/Abstract] OR "coronary disease"[MeSH Terms] OR "coronary disease"[Title/Abstract] OR "Coronary Diseases"[Title/Abstract] OR "disease coronary"[Title/Abstract] OR "diseases coronary"[Title/Abstract] OR "Coronary Heart Disease"[Title/Abstract] OR "Coronary Heart Diseases"[Title/Abstract] OR "disease coronary heart"[Title/Abstract] OR "diseases coronary heart"[Title/Abstract] OR "heart disease coronary"[Title/Abstract] OR "heart diseases coronary"[Title/Abstract] OR "coronary artery disease"[MeSH Terms] OR "coronary artery disease"[Title/Abstract] OR "artery disease coronary"[Title/Abstract] OR "artery diseases coronary"[Title/Abstract] OR "Coronary Artery Diseases"[Title/Abstract] OR "Left Main Coronary Artery Disease"[Title/Abstract] OR "Left Main Disease"[Title/Abstract] OR "Left Main Diseases"[Title/Abstract] OR "Left Main Coronary Disease"[Title/Abstract] OR "Coronary Arteriosclerosis"[Title/Abstract] OR "atherosclerosis coronary"[Title/Abstract] OR "Coronary Atherosclerosis"[Title/Abstract] OR "arteriosclerosis coronary"[Title/Abstract] OR "Coronary Heart Disease"[Title/Abstract] OR "Myocardial Infarction"[MeSH Terms] OR "Myocardial Infarction"[Title/Abstract] OR "infarction myocardial"[Title/Abstract] OR "infarctions myocardial"[Title/Abstract] OR "Myocardial Infarctions"[Title/Abstract] OR "Cardiovascular Stroke"[Title/Abstract] OR "stroke cardiovascular"[Title/Abstract] OR "strokes cardiovascular"[Title/Abstract] OR "Myocardial Infarct"[Title/Abstract] OR "infarct myocardial"[Title/Abstract] OR "infarcts myocardial"[Title/Abstract] OR "Myocardial Infarcts"[Title/Abstract] OR "Heart Attack"[Title/Abstract] OR "Heart Attacks"[Title/Abstract] OR "acute coronary syndrome"[MeSH Terms] OR "angina pectoris"[MeSH Terms] OR "acute coronary syndrome"[Title/Abstract] OR "angina pectoris"[Title/Abstract] OR "Heart Arrest"[MeSH Terms] OR "Heart Arrest"[Title/Abstract] OR "arrest heart"[Title/Abstract] OR "Cardiac Arrest"[Title/Abstract] OR "arrest cardiac"[Title/Abstract] OR "Asystole"[Title/Abstract] OR "Asystoles"[Title/Abstract] OR "Cardiopulmonary Arrest"[Title/Abstract] OR "arrest cardiopulmonary"[Title/Abstract] OR "death, sudden, cardiac"[MeSH Terms] OR "death sudden cardiac"[Title/Abstract] OR "Sudden Cardiac Death"[Title/Abstract] OR "cardiac death sudden"[Title/Abstract] OR "death sudden cardiac"[Title/Abstract] OR "Cardiac Sudden Death"[Title/Abstract] OR "death cardiac sudden"[Title/Abstract] OR "sudden death cardiac"[Title/Abstract] OR "Sudden Cardiac Arrest"[Title/Abstract] OR "arrest sudden cardiac"[Title/Abstract] OR "cardiac arrest sudden"[Title/Abstract] OR "cardiovascular mortality"[Title/Abstract] OR "cardiovascular death"[Title/Abstract] OR "stroke"[MeSH Terms] OR |
|--------|-------------------------------------------------------------------------------------------------------------------------------------------------------------------------------------------------------------------------------------------------------------------------------------------------------------------------------------------------------------------------------------------------------------------------------------------------------------------------------------------------------------------------------------------------------------------------------------------------------------------------------------------------------------------------------------------------------------------------------------------------------------------------------------------------------------------------------------------------------------------------------------------------------------------------------------------------------------------------------------------------------------------------------------------------------------------------------------------------------------------------------------------------------------------------------------------------------------------------------------------------------------------------------------------------------------------------------------------------------------------------------------------------------------------------------------------------------------------------------------------------------------------------------------------------------------------------------------------------------------------------------------------------------------------------------------------------------------------------------------------------------------------------------------------------------------------------------------------------------------------------------------------------------------------------------------------------------------------------------------------------------------------------------------------------------------------------------------------------------------------------------------------------------------------------------------------------------------------------------------------------------------------------------------------------------------------------------------------------------------------------------------------------------------------------------------------------------------------------------------------------------------------------------------------------------------------------------------------------------------------------------------------------------------------------------------------------------------------------------------------------------------------------------------------------------------------------------------------------------------------------------------------------------------------------------------------------------------------------------------------------------------------------------------------------------------------------------------------------------------------------------------------------------------------------------------------------------------------------------------------------------------------------------------------------------------------|

|  |                                                                                                                                                                                                                                                                                                                                                                                                                                                                                                                                                                                                                                                                                                                                                                                                                                                                                                                                                                                                                                                                                                                                                                                                                                                                                                                                                                                                                                                                                                                                                                                                                                                                                                                                                                                                                                                                                                                                                                                                                                                                                                                                                                                                                                                                                                                                                                                                                                                                                                                                                                                                                                                                                                                                                                                                                                                                                                                                                                                                                                                                                                                                                                                                                                                                                                                                                                                                                                                                                                                                                                                                                                                                                                                                                                                                                                                                                                                                                                                                                                                                                                                                                                        |
|--|------------------------------------------------------------------------------------------------------------------------------------------------------------------------------------------------------------------------------------------------------------------------------------------------------------------------------------------------------------------------------------------------------------------------------------------------------------------------------------------------------------------------------------------------------------------------------------------------------------------------------------------------------------------------------------------------------------------------------------------------------------------------------------------------------------------------------------------------------------------------------------------------------------------------------------------------------------------------------------------------------------------------------------------------------------------------------------------------------------------------------------------------------------------------------------------------------------------------------------------------------------------------------------------------------------------------------------------------------------------------------------------------------------------------------------------------------------------------------------------------------------------------------------------------------------------------------------------------------------------------------------------------------------------------------------------------------------------------------------------------------------------------------------------------------------------------------------------------------------------------------------------------------------------------------------------------------------------------------------------------------------------------------------------------------------------------------------------------------------------------------------------------------------------------------------------------------------------------------------------------------------------------------------------------------------------------------------------------------------------------------------------------------------------------------------------------------------------------------------------------------------------------------------------------------------------------------------------------------------------------------------------------------------------------------------------------------------------------------------------------------------------------------------------------------------------------------------------------------------------------------------------------------------------------------------------------------------------------------------------------------------------------------------------------------------------------------------------------------------------------------------------------------------------------------------------------------------------------------------------------------------------------------------------------------------------------------------------------------------------------------------------------------------------------------------------------------------------------------------------------------------------------------------------------------------------------------------------------------------------------------------------------------------------------------------------------------------------------------------------------------------------------------------------------------------------------------------------------------------------------------------------------------------------------------------------------------------------------------------------------------------------------------------------------------------------------------------------------------------------------------------------------------------------------|
|  | <p>"Cerebrovascular Accident"[Text Word] OR "Strokes"[Title/Abstract] OR "Cerebrovascular Accident"[Title/Abstract] OR "Cerebrovascular Accidents"[Title/Abstract] OR "cva cerebrovascular accident"[Title/Abstract] OR "Cerebrovascular Apoplexy"[Title/Abstract] OR "apoplexy cerebrovascular"[Title/Abstract] OR "vascular accident brain"[Title/Abstract] OR "Brain Vascular Accident"[Title/Abstract] OR "Brain Vascular Accidents"[Title/Abstract] OR "Cerebrovascular Stroke"[Title/Abstract] OR "Cerebrovascular Strokes"[Title/Abstract] OR "stroke cerebrovascular"[Title/Abstract] OR "strokes cerebrovascular"[Title/Abstract] OR "Apoplexy"[Title/Abstract] OR "Cerebral Stroke"[Title/Abstract] OR "Cerebral Strokes"[Title/Abstract] OR "stroke cerebral"[Title/Abstract] OR "strokes cerebral"[Title/Abstract] OR "stroke acute"[Title/Abstract] OR "Acute Stroke"[Title/Abstract] OR "Acute Strokes"[Title/Abstract] OR "strokes acute"[Title/Abstract] OR "cerebrovascular accident acute"[Title/Abstract] OR "Acute Cerebrovascular Accident"[Title/Abstract] OR "Acute Cerebrovascular Accidents"[Title/Abstract] OR "cerebrovascular accidents acute"[Title/Abstract] OR "brain attack"[Title/Abstract] OR "brain infarction"[MeSH Terms] OR "brain infarction"[Title/Abstract] OR "Brain Infarctions"[Title/Abstract] OR "infarction brain"[Title/Abstract] OR "infarctions brain"[Title/Abstract] OR "Brain Infarct"[Title/Abstract] OR "Brain Infarcts"[Title/Abstract] OR "infarct brain"[Title/Abstract] OR "infarcts brain"[Title/Abstract] OR "Anterior Circulation Brain Infarction"[Title/Abstract] OR "venous infarction brain"[Title/Abstract] OR "Brain Venous Infarction"[Title/Abstract] OR "venous infarctions brain"[Title/Abstract] OR "Venous Brain Infarctions"[Title/Abstract] OR "Anterior Cerebral Circulation Infarction"[Title/Abstract] OR "brain infarction posterior circulation"[Title/Abstract] OR "Posterior Circulation Brain Infarction"[Title/Abstract] OR "Ischemic Stroke"[MeSH Terms] OR "Ischemic Stroke"[Title/Abstract] OR "carotid artery diseases"[MeSH Terms] OR "carotid artery disease"[Title/Abstract] OR "cerebral small vessel diseases"[MeSH Terms] OR "cerebral small vessel disease"[Title/Abstract] OR "intracranial artery disease"[Title/Abstract] OR "cerebral arterial diseases"[MeSH Terms] OR "intracranial arteriosclerosis"[MeSH Terms] OR "arteriosclerosis intracranial"[Title/Abstract] OR "Intracranial Atherosclerosis"[Title/Abstract] OR "atherosclerosis intracranial"[Title/Abstract] OR "Cerebral Arteriosclerosis"[Title/Abstract] OR "arteriosclerosis cerebral"[Title/Abstract] OR "Cerebral Atherosclerosis"[Title/Abstract] OR "atherosclerosis cerebral"[Title/Abstract] OR "intracranial embolism and thrombosis"[MeSH Terms] OR "Cerebral Embolism and Thrombosis"[Title/Abstract] OR "cerebral infarction"[MeSH Terms] OR "cerebral ischemia"[Title/Abstract] OR "cerebral ischaemia"[Title/Abstract] OR "brain ischemia"[MeSH Terms] OR "brain ischaemia"[Title/Abstract]) AND ("diet, vegetarian"[MeSH Terms] OR "diet vegetarian"[Title/Abstract] OR "diets vegetarian"[Title/Abstract] OR "Vegetarian Diets"[Title/Abstract] OR "Vegetarian Diet"[Title/Abstract] OR "lacto vegetarian diet"[Title/Abstract] OR "lacto vegetarian diet"[Title/Abstract] OR "Lacto-Vegetarian Diets"[Title/Abstract] OR "plant based diet"[Title/Abstract] OR "diets plant based"[Title/Abstract] OR "plant based diet"[Title/Abstract] OR "Plant-Based Diets"[Title/Abstract] OR "diet plant based"[Title/Abstract] OR "diet plant based"[Title/Abstract] OR "plant based nutrition"[Title/Abstract] OR "nutrition plant based"[Title/Abstract] OR "plant based nutrition"[Title/Abstract] OR "lacto ovo vegetarian diet"[Title/Abstract] OR "diet lacto ovo vegetarian"[Title/Abstract] OR "diets lacto ovo vegetarian"[Title/Abstract] OR "lacto ovo vegetarian diet"[Title/Abstract] OR "Lacto-Ovo Vegetarian Diets"[Title/Abstract] OR "Vegetarianism"[Title/Abstract] OR "Vegetarians"[MeSH Terms] OR "Vegetarian"[Title/Abstract] OR "Vegetarians"[Title/Abstract] OR</p> |
|--|------------------------------------------------------------------------------------------------------------------------------------------------------------------------------------------------------------------------------------------------------------------------------------------------------------------------------------------------------------------------------------------------------------------------------------------------------------------------------------------------------------------------------------------------------------------------------------------------------------------------------------------------------------------------------------------------------------------------------------------------------------------------------------------------------------------------------------------------------------------------------------------------------------------------------------------------------------------------------------------------------------------------------------------------------------------------------------------------------------------------------------------------------------------------------------------------------------------------------------------------------------------------------------------------------------------------------------------------------------------------------------------------------------------------------------------------------------------------------------------------------------------------------------------------------------------------------------------------------------------------------------------------------------------------------------------------------------------------------------------------------------------------------------------------------------------------------------------------------------------------------------------------------------------------------------------------------------------------------------------------------------------------------------------------------------------------------------------------------------------------------------------------------------------------------------------------------------------------------------------------------------------------------------------------------------------------------------------------------------------------------------------------------------------------------------------------------------------------------------------------------------------------------------------------------------------------------------------------------------------------------------------------------------------------------------------------------------------------------------------------------------------------------------------------------------------------------------------------------------------------------------------------------------------------------------------------------------------------------------------------------------------------------------------------------------------------------------------------------------------------------------------------------------------------------------------------------------------------------------------------------------------------------------------------------------------------------------------------------------------------------------------------------------------------------------------------------------------------------------------------------------------------------------------------------------------------------------------------------------------------------------------------------------------------------------------------------------------------------------------------------------------------------------------------------------------------------------------------------------------------------------------------------------------------------------------------------------------------------------------------------------------------------------------------------------------------------------------------------------------------------------------------------------------------|

|  |                                                                                                                                                                                                                                                                                                                                                                                                                                                                                                                                                                                                                                                                                                                                                                                                                                                                                                                                                                                                                                                                                                                                                                                                                                                                                                                                                                                                                                                                                                                                                                                                                                                                                                                                                                                                                                                                                                                                                                                                                                                                                                                                                                                                                                                                                                                                                                                                                                                                                                                                                                                                                                                                                                                                                                                                                                                                                                                                                                                                                                                                                                                                                                                                                                                                                                                                                                                                                                                                                                                                                                                                                                                                                                                                                                                                                                                                                                                                                                                                                                                                                 |
|--|---------------------------------------------------------------------------------------------------------------------------------------------------------------------------------------------------------------------------------------------------------------------------------------------------------------------------------------------------------------------------------------------------------------------------------------------------------------------------------------------------------------------------------------------------------------------------------------------------------------------------------------------------------------------------------------------------------------------------------------------------------------------------------------------------------------------------------------------------------------------------------------------------------------------------------------------------------------------------------------------------------------------------------------------------------------------------------------------------------------------------------------------------------------------------------------------------------------------------------------------------------------------------------------------------------------------------------------------------------------------------------------------------------------------------------------------------------------------------------------------------------------------------------------------------------------------------------------------------------------------------------------------------------------------------------------------------------------------------------------------------------------------------------------------------------------------------------------------------------------------------------------------------------------------------------------------------------------------------------------------------------------------------------------------------------------------------------------------------------------------------------------------------------------------------------------------------------------------------------------------------------------------------------------------------------------------------------------------------------------------------------------------------------------------------------------------------------------------------------------------------------------------------------------------------------------------------------------------------------------------------------------------------------------------------------------------------------------------------------------------------------------------------------------------------------------------------------------------------------------------------------------------------------------------------------------------------------------------------------------------------------------------------------------------------------------------------------------------------------------------------------------------------------------------------------------------------------------------------------------------------------------------------------------------------------------------------------------------------------------------------------------------------------------------------------------------------------------------------------------------------------------------------------------------------------------------------------------------------------------------------------------------------------------------------------------------------------------------------------------------------------------------------------------------------------------------------------------------------------------------------------------------------------------------------------------------------------------------------------------------------------------------------------------------------------------------------------|
|  | <p>"Vegetarian"[Title/Abstract] OR "lacto ovo vegetarians"[Title/Abstract] OR "lacto ovo vegetarians"[Title/Abstract] OR "Lacto-Ovo Vegetarian"[Title/Abstract] OR "vegetarian lacto ovo"[Title/Abstract] OR "vegetarians lacto ovo"[Title/Abstract] OR "ovo lacto vegetarians"[Title/Abstract] OR "ovo lacto vegetarians"[Title/Abstract] OR "Ovo-Lacto Vegetarian"[Title/Abstract] OR "diet, vegan"[MeSH Terms] OR "diet vegan"[Title/Abstract] OR "diets vegan"[Title/Abstract] OR "Vegan Diets"[Title/Abstract] OR "Vegan Diet"[Title/Abstract] OR "Veganism"[Title/Abstract] OR "vegans"[MeSH Terms] OR "vegans"[Title/Abstract] OR "vegan"[Title/Abstract] OR "seventh day adventists"[Title/Abstract] OR "seventh day adventists"[Title/Abstract] OR "Seventh-Day Adventist"[Title/Abstract] OR "diet, western"[MeSH Terms] OR "diet western"[Title/Abstract] OR "diet, mediterranean"[MeSH Terms] OR "mediterranean diet"[Title/Abstract] OR "mediterranean diet"[Title/Abstract] OR "Feeding Behavior"[MeSH Terms] OR "Feeding Behavior"[Title/Abstract] OR "behavior feeding"[Title/Abstract] OR "Feeding Behaviors"[Title/Abstract] OR "Eating Behavior"[Title/Abstract] OR "behavior eating"[Title/Abstract] OR "Eating Behaviors"[Title/Abstract] OR "feeding related behavior"[Title/Abstract] OR "feeding related behavior"[Title/Abstract] OR "Feeding-Related Behaviors"[Title/Abstract] OR "Feeding Patterns"[Title/Abstract] OR "Feeding Pattern"[Title/Abstract] OR "pattern feeding"[Title/Abstract] OR "Food Habits"[Title/Abstract] OR "Food Habit"[Title/Abstract] OR "habit food"[Title/Abstract] OR "Eating Habits"[Title/Abstract] OR "Eating Habit"[Title/Abstract] OR "habit eating"[Title/Abstract] OR "Dietary Habits"[Title/Abstract] OR "Dietary Habit"[Title/Abstract] OR "habit dietary"[Title/Abstract] OR "Diet Habits"[Title/Abstract] OR "Diet Habit"[Title/Abstract] OR "habit diet"[Title/Abstract] OR "habits diet"[Title/Abstract] OR "dietary pattern"[Title/Abstract] OR "eating pattern"[Title/Abstract] OR "food pattern"[Title/Abstract])</p> <p>AND "systematic"[filter] OR "meta-analysis"[pt] OR "meta-analysis as topic"[mh] OR "meta analy*"[tw] OR metanaly*[tw] OR metaanaly*[tw] OR "met analy*"[tw] OR "integrative research"[tiab] OR "integrative review*"[tiab] OR "integrative overview*"[tiab] OR "research integration*"[tiab] OR "research overview*"[tiab] OR "collaborative review*"[tiab] OR "collaborative overview*"[tiab] OR "systematic review"[pt] OR "systematic reviews as topic"[mh] OR "systematic review*"[tiab] OR "technology assessment*"[tiab] OR "technology overview*"[tiab] OR "technology appraisal*"[tiab] OR "Technology Assessment, Biomedical"[mh] OR HTA[tiab] OR HTAs[tiab] OR "comparative efficacy"[tiab] OR "comparative effectiveness"[tiab] OR "outcomes research"[tiab] OR "indirect comparison*"[tiab] OR "Bayesian comparison"[tiab] OR (("indirect treatment"[tiab] OR "mixed-treatment"[tiab]) AND comparison*[tiab]) OR Embase*[tiab] OR Cinahl*[tiab] OR "systematic overview*"[tiab] OR "methodological overview*"[tiab] OR "methodologic overview*"[tiab] OR "methodological review*"[tiab] OR "methodologic review*"[tiab] OR "quantitative review*"[tiab] OR "quantitative overview*"[tiab] OR "quantitative syntheses*"[tiab] OR "pooled analy*"[tiab] OR Cochrane[tiab] OR Medline[tiab] OR Pubmed[tiab] OR Medlars[tiab] OR handsearch*[tiab] OR "hand search*"[tiab] OR "meta-regression*"[tiab] OR metaregression*[tiab] OR "data syntheses*"[tiab] OR "data extraction"[tiab] OR "data abstraction*"[tiab] OR "mantel haenszel"[tiab] OR peto[tiab] OR "der-simonian"[tiab] OR dersimonian[tiab] OR "fixed effect*"[tiab] OR "multiple treatment comparison"[tiab] OR "mixed treatment meta-analys*"[tiab] OR "umbrella review*"[tiab] OR (("multiple paramet*"[tiab]) AND ("evidence synthesis"[tiab])) OR ("multi-paramet*"[tiab]) AND ("evidence synthesis"[tiab])) OR ((multiparameter*[tiab]) AND ("evidence synthesis"[tiab])) OR "Cochrane Database</p> |
|--|---------------------------------------------------------------------------------------------------------------------------------------------------------------------------------------------------------------------------------------------------------------------------------------------------------------------------------------------------------------------------------------------------------------------------------------------------------------------------------------------------------------------------------------------------------------------------------------------------------------------------------------------------------------------------------------------------------------------------------------------------------------------------------------------------------------------------------------------------------------------------------------------------------------------------------------------------------------------------------------------------------------------------------------------------------------------------------------------------------------------------------------------------------------------------------------------------------------------------------------------------------------------------------------------------------------------------------------------------------------------------------------------------------------------------------------------------------------------------------------------------------------------------------------------------------------------------------------------------------------------------------------------------------------------------------------------------------------------------------------------------------------------------------------------------------------------------------------------------------------------------------------------------------------------------------------------------------------------------------------------------------------------------------------------------------------------------------------------------------------------------------------------------------------------------------------------------------------------------------------------------------------------------------------------------------------------------------------------------------------------------------------------------------------------------------------------------------------------------------------------------------------------------------------------------------------------------------------------------------------------------------------------------------------------------------------------------------------------------------------------------------------------------------------------------------------------------------------------------------------------------------------------------------------------------------------------------------------------------------------------------------------------------------------------------------------------------------------------------------------------------------------------------------------------------------------------------------------------------------------------------------------------------------------------------------------------------------------------------------------------------------------------------------------------------------------------------------------------------------------------------------------------------------------------------------------------------------------------------------------------------------------------------------------------------------------------------------------------------------------------------------------------------------------------------------------------------------------------------------------------------------------------------------------------------------------------------------------------------------------------------------------------------------------------------------------------------------|

|        |                                                                                                                                                                                                                                                                                                                                                                                                                                                                                                                                                                                                                                                                                                                                                                                                                                                                                                                                                                                                                                                                                                                                                                                                                                                                                                                                                                                                                                                                                                                                                                                                                                                                                                                                                                                                                                                                                                                                                                                                                                                                                                                                                                                                                                                                                                                                                                                                                                                                                                                                                                                                                                                                                                                                                                                                                                                                                                                                                                                                                                                                                                                                                                                                                                                                                                                                                                                                                                                                                                                                                                                                                                                                                                                             |
|--------|-----------------------------------------------------------------------------------------------------------------------------------------------------------------------------------------------------------------------------------------------------------------------------------------------------------------------------------------------------------------------------------------------------------------------------------------------------------------------------------------------------------------------------------------------------------------------------------------------------------------------------------------------------------------------------------------------------------------------------------------------------------------------------------------------------------------------------------------------------------------------------------------------------------------------------------------------------------------------------------------------------------------------------------------------------------------------------------------------------------------------------------------------------------------------------------------------------------------------------------------------------------------------------------------------------------------------------------------------------------------------------------------------------------------------------------------------------------------------------------------------------------------------------------------------------------------------------------------------------------------------------------------------------------------------------------------------------------------------------------------------------------------------------------------------------------------------------------------------------------------------------------------------------------------------------------------------------------------------------------------------------------------------------------------------------------------------------------------------------------------------------------------------------------------------------------------------------------------------------------------------------------------------------------------------------------------------------------------------------------------------------------------------------------------------------------------------------------------------------------------------------------------------------------------------------------------------------------------------------------------------------------------------------------------------------------------------------------------------------------------------------------------------------------------------------------------------------------------------------------------------------------------------------------------------------------------------------------------------------------------------------------------------------------------------------------------------------------------------------------------------------------------------------------------------------------------------------------------------------------------------------------------------------------------------------------------------------------------------------------------------------------------------------------------------------------------------------------------------------------------------------------------------------------------------------------------------------------------------------------------------------------------------------------------------------------------------------------------------------|
|        | Syst Rev"[Journal] OR "health technology assessment winchester, england"[Journal] OR "Evid Rep Technol Assess (Full Rep)"[Journal] OR "Evid Rep Technol Assess (Summ)"[Journal] OR "Int J Technol Assess Health Care"[Journal] OR "GMS Health Technol Assess"[Journal] OR "Health Technol Assess (Rockv)"[Journal] OR "Health Technol Assess Rep"[Journal]                                                                                                                                                                                                                                                                                                                                                                                                                                                                                                                                                                                                                                                                                                                                                                                                                                                                                                                                                                                                                                                                                                                                                                                                                                                                                                                                                                                                                                                                                                                                                                                                                                                                                                                                                                                                                                                                                                                                                                                                                                                                                                                                                                                                                                                                                                                                                                                                                                                                                                                                                                                                                                                                                                                                                                                                                                                                                                                                                                                                                                                                                                                                                                                                                                                                                                                                                                  |
| Scopus | TITLE-ABS ( ( "myocardial ischemia" OR "Ischemia, Myocardial" OR "Ischemias, Myocardial" OR "Myocardial Ischemias" OR "Ischemic Heart Disease" OR "Heart Disease, Ischemic" OR "Disease, Ischemic Heart" OR "Diseases, Ischemic Heart" OR "Heart Diseases, Ischemic" OR "Ischemic Heart Diseases" OR "coronary disease" OR "Coronary Diseases" OR "Disease, Coronary" OR "Diseases, Coronary" OR "Coronary Heart Disease" OR "Coronary Heart Diseases" OR "Disease, Coronary Heart" OR "Diseases, Coronary Heart" OR "Heart Disease, Coronary" OR "Heart Diseases, Coronary" OR "Coronary Heart Disease" OR "Myocardial Infarction" OR "Infarction, Myocardial" OR "Infarctions, Myocardial" OR "Myocardial Infarctions" OR "Cardiovascular Stroke" OR "Cardiovascular Strokes" OR "Stroke, Cardiovascular" OR "Strokes, Cardiovascular" OR "Myocardial Infarct" OR "Infarct, Myocardial" OR "Infarcts, Myocardial" OR "Myocardial Infarcts" OR "Heart Attack" OR "Heart Attacks" OR "acute coronary syndrome" OR "angina pectoris" OR "acute coronary syndrome" OR "angina pectoris" OR "Heart Arrest" OR "Arrest, Heart" OR "Cardiac Arrest" OR "Arrest, Cardiac" OR "Asystole" OR "Asystoles" OR "Cardiopulmonary Arrest" OR "Arrest, Cardiopulmonary" OR "Death, Sudden, Cardiac" OR "Sudden Cardiac Death" OR "Cardiac Death, Sudden" OR "Death, Sudden Cardiac" OR "Cardiac Sudden Death" OR "Death, Cardiac Sudden" OR "Sudden Death, Cardiac" OR "Sudden Cardiac Arrest" OR "Arrest, Sudden Cardiac" OR "Cardiac Arrests, Sudden" OR "Cardiac Arrest, Sudden" OR "cardiovascular mortality" OR "cardiovascular death" OR "stroke" OR "cerebrovascular accident" OR "Strokes" OR "Cerebrovascular Accident" OR "Cerebrovascular Accidents" OR "CVA (Cerebrovascular Accident)" OR "CVAs (Cerebrovascular Accident)" OR "Cerebrovascular Apoplexy" OR "Apoplexy, Cerebrovascular" OR "Vascular Accident, Brain" OR "Brain Vascular Accident" OR "Brain Vascular Accidents" OR "Vascular Accidents, Brain" OR "Cerebrovascular Stroke" OR "Cerebrovascular Strokes" OR "Stroke, Cerebrovascular" OR "Strokes, Cerebrovascular" OR "Apoplexy" OR "Cerebral Stroke" OR "Cerebral Strokes" OR "Stroke, Cerebral" OR "Strokes, Cerebral" OR "Stroke, Acute" OR "Acute Stroke" OR "Acute Strokes" OR "Strokes, Acute" OR "Cerebrovascular Accident, Acute" OR "Acute Cerebrovascular Accident" OR "Acute Cerebrovascular Accidents" OR "Cerebrovascular Accidents, Acute" OR "brain attack" OR "brain infarction" OR "Brain Infarctions" OR "Infarction, Brain" OR "Infarctions, Brain" OR "Brain Infarct" OR "Brain Infarcts" OR "Infarct, Brain" OR "Infarcts, Brain" OR "Anterior Circulation Brain Infarction" OR "Infarction, Brain, Anterior Circulation" OR "Infarction, Anterior Circulation, Brain" OR "Anterior Circulation Infarction, Brain" OR "Brain Infarction, Anterior Circulation" OR "Venous Infarction, Brain" OR "Brain Venous Infarction" OR "Brain Venous Infarctions" OR "Infarction, Brain Venous" OR "Infarctions, Brain Venous" OR "Venous Infarctions, Brain" OR "Brain Infarction, Venous" OR "Brain Infarctions, Venous" OR "Infarction, Venous Brain" OR "Infarctions, Venous Brain" OR "Venous Brain Infarction" OR "Venous Brain Infarctions" OR "Anterior Cerebral Circulation Infarction" OR "Infarction, Anterior Cerebral Circulation" OR "Brain Infarction, Posterior Circulation" OR "Posterior Circulation Infarction, Brain" OR "Posterior Circulation Brain Infarction" OR "Infarction, Brain, Posterior Circulation" OR "Infarction, Posterior Circulation, Brain" OR "Hemorrhagic Stroke" OR "Ischemic Stroke" OR "carotid artery diseases" OR "cerebral small vessel diseases" |

|  |                                                                                                                                                                                                                                                                                                                                                                                                                                                                                                                                                                                                                                                                                                                                                                                                                                                                                                                                                                                                                                                                                                                                                                                                                                                                                                                                                                                                                                                                                                                                                                                                                                                                                                                                                                                                                                                                                                                                                                                                                                                                                                                                                                                                                                                                                                                                                                                                                                                                                                                                                                                                                                                                  |
|--|------------------------------------------------------------------------------------------------------------------------------------------------------------------------------------------------------------------------------------------------------------------------------------------------------------------------------------------------------------------------------------------------------------------------------------------------------------------------------------------------------------------------------------------------------------------------------------------------------------------------------------------------------------------------------------------------------------------------------------------------------------------------------------------------------------------------------------------------------------------------------------------------------------------------------------------------------------------------------------------------------------------------------------------------------------------------------------------------------------------------------------------------------------------------------------------------------------------------------------------------------------------------------------------------------------------------------------------------------------------------------------------------------------------------------------------------------------------------------------------------------------------------------------------------------------------------------------------------------------------------------------------------------------------------------------------------------------------------------------------------------------------------------------------------------------------------------------------------------------------------------------------------------------------------------------------------------------------------------------------------------------------------------------------------------------------------------------------------------------------------------------------------------------------------------------------------------------------------------------------------------------------------------------------------------------------------------------------------------------------------------------------------------------------------------------------------------------------------------------------------------------------------------------------------------------------------------------------------------------------------------------------------------------------|
|  | <p>OR "intracranial artery disease" OR "cerebral arterial diseases" OR "cerebral artery disease" OR "intracranial arteriosclerosis" OR "intracranial embolism and thrombosis" OR "intracranial hemorrhages" OR "intracranial hemorrhage" OR "intracranial haemorrhage" OR "cerebral haemorrhage" OR "cerebral haemorrhage" OR "intracerebral hemorrhage" OR "intracerebral haemorrhage" OR "subarachnoid haemorrhage" OR "subarachnoid haemorrhage" OR "cerebral infarction" OR "cerebral ischemia" OR "cerebral ischaemia" OR "brain ischemia" OR "brain ischaemia" OR "brain hemorrhage" OR "brain haemorrhage" ) AND ( "diet, vegetarian" OR "Diets, Vegetarian" OR "Vegetarian Diets" OR "Vegetarian Diet" OR "Lacto-Vegetarian Diet" OR "Diet, Lacto-Vegetarian" OR "Diets, Lacto-Vegetarian" OR "Lacto Vegetarian Diet" OR "Lacto-Vegetarian Diets" OR "Plant-Based Diet" OR "Diets, Plant-Based" OR "Plant Based Diet" OR "Plant-Based Diets" OR "Diet, Plant-Based" OR "Diet, Plant Based" OR "Plant-Based Nutrition" OR "Nutrition, Plant-Based" OR "Plant Based Nutrition" OR "Lacto-Ovo Vegetarian Diet" OR "Diet, Lacto-Ovo Vegetarian" OR "Diets, Lacto-Ovo Vegetarian" OR "Lacto Ovo Vegetarian Diet" OR "Lacto-Ovo Vegetarian Diets" OR "Vegetarian Diet, Lacto-Ovo" OR "Vegetarian Diets, Lacto-Ovo" OR "Vegetarianism" OR "Vegetarians" OR vegetarian OR "Lacto-Ovo Vegetarians" OR "Lacto Ovo Vegetarians" OR "Lacto-Ovo Vegetarian" OR "Vegetarian, Lacto-Ovo" OR "Vegetarians, Lacto-Ovo" OR "Ovo-Lacto Vegetarians" OR "Ovo Lacto Vegetarians" OR "Ovo-Lacto Vegetarian" OR "Vegetarian, Ovo-Lacto" OR "Vegetarians, Ovo-Lacto" OR "Diet, Vegan" OR "Diets, Vegan" OR "Vegan Diets" OR "Vegan Diet" OR "Veganism" OR "vegans" OR vegan OR "Seventh-Day Adventists" OR "Adventist, Seventh-Day" OR "Adventists, Seventh-Day" OR "Seventh Day Adventists" OR "Seventh-Day Adventist" OR "mediterranean diet" OR "mediterranean diets" OR "Diet, Western" OR "Diet, Western" OR "Feeding Behavior" OR "Feeding Behavior" OR "Behavior, Feeding" OR "Feeding Behaviors" OR "Eating Behavior" OR "Behavior, Eating" OR "Eating Behaviors" OR "Feeding-Related Behavior" OR "Behavior, Feeding-Related" OR "Feeding Related Behavior" OR "Feeding-Related Behaviors" OR "Feeding Patterns" OR "Feeding Pattern" OR "Pattern, Feeding" OR "Food Habits" OR "Food Habit" OR "Habit, Food" OR "Eating Habits" OR "Eating Habit" OR "Habit, Eating" OR "Dietary Habits" OR "Dietary Habit" OR "Habit, Dietary" OR "Diet Habits" OR "Diet Habit" OR "Habit, Diet" OR "Habits, Diet" OR "dietary pattern" OR "eating pattern" OR "food pattern" ) )</p> |
|  | AND                                                                                                                                                                                                                                                                                                                                                                                                                                                                                                                                                                                                                                                                                                                                                                                                                                                                                                                                                                                                                                                                                                                                                                                                                                                                                                                                                                                                                                                                                                                                                                                                                                                                                                                                                                                                                                                                                                                                                                                                                                                                                                                                                                                                                                                                                                                                                                                                                                                                                                                                                                                                                                                              |
|  | <p>TITLE-ABS-KEY((systematic* W/3 (review* OR overview* )) OR (methodologic* W/3 (review* OR overview* ))) OR TITLE-ABS-KEY((quantitative W/3 (review* OR overview* OR syntheses* )) OR (research W/3 (integrati* OR overview* ))) OR TITLE-ABS-KEY((integrative W/3 (review* OR overview* )) OR (collaborative W/3 (review* OR overview* )) OR (pool* W/3 analy* )) OR TITLE-ABS-KEY("data syntheses*" OR "data extraction*" OR "data abstraction*" ) OR TITLE-ABS-KEY(handsearch* OR "hand search*" ) OR TITLE-ABS-KEY("mantel haenszel" OR peto OR "der simonian" OR dersimonian OR "fixed effect*" OR "latin square*" ) OR TITLE-ABS-KEY("met analy*" OR metanaly* OR "technology assessment*" OR HTA OR HTAs OR "technology overview*" OR "technology appraisal*" ) OR TITLE-ABS-KEY("meta regression*" OR metaregression* ) OR TITLE-ABS-KEY(meta-analy* OR metaanaly* OR "systematic review*" OR "biomedical technology assessment*" OR "bio-medical technology assessment*" ) OR TITLE-ABS-KEY(medline OR cochrane OR pubmed OR medlars OR embase OR cinahl ) OR SRCTITLE(cochrane OR (health W/2 "technology assessment" ) OR "evidence report" ) OR TITLE-ABS-KEY(comparative W/3 (efficacy</p>                                                                                                                                                                                                                                                                                                                                                                                                                                                                                                                                                                                                                                                                                                                                                                                                                                                                                                                                                                                                                                                                                                                                                                                                                                                                                                                                                                                                                                                        |

|        |                                                                                                                                                                                                                                                                                                                                                                                                                                                                                                                                                                                                                                                                                                                                                                                                                                                                                                                                                                                                                                                                                                                                                                                                                                                                                                                                                                                                                                                                                                                                                                                                                                                                                                                                                                                                                                                                                                                                                                                                                                                                                                                                                                                                                                                                                                                                                                                                                                                                                                                                                                                                                                                                                                                                                                                                                                                                                                                                                                       |
|--------|-----------------------------------------------------------------------------------------------------------------------------------------------------------------------------------------------------------------------------------------------------------------------------------------------------------------------------------------------------------------------------------------------------------------------------------------------------------------------------------------------------------------------------------------------------------------------------------------------------------------------------------------------------------------------------------------------------------------------------------------------------------------------------------------------------------------------------------------------------------------------------------------------------------------------------------------------------------------------------------------------------------------------------------------------------------------------------------------------------------------------------------------------------------------------------------------------------------------------------------------------------------------------------------------------------------------------------------------------------------------------------------------------------------------------------------------------------------------------------------------------------------------------------------------------------------------------------------------------------------------------------------------------------------------------------------------------------------------------------------------------------------------------------------------------------------------------------------------------------------------------------------------------------------------------------------------------------------------------------------------------------------------------------------------------------------------------------------------------------------------------------------------------------------------------------------------------------------------------------------------------------------------------------------------------------------------------------------------------------------------------------------------------------------------------------------------------------------------------------------------------------------------------------------------------------------------------------------------------------------------------------------------------------------------------------------------------------------------------------------------------------------------------------------------------------------------------------------------------------------------------------------------------------------------------------------------------------------------------|
|        | OR effectiveness )) OR TITLE-ABS-KEY("outcomes research" OR "relative effectiveness" ) OR TITLE-ABS-KEY((indirect OR "indirect treatment" OR mixed-treatment OR bayesian ) W/3 comparison* ) OR TITLE-ABS-KEY(multi* W/3 treatment W/3 comparison* ) OR TITLE-ABS-KEY(mixed W/3 treatment W/3 (meta-analy* OR metaanaly* )) OR TITLE-ABS-KEY("umbrella review*") OR TITLE-ABS-KEY(multi* W/2 paramet* W/2 evidence W/2 synthesis ) OR TITLE-ABS-KEY(multiparamet* W/2 evidence W/2 synthesis ) OR TITLE-ABS-KEY(multi-paramet* W/2 evidence W/2 synthesis )                                                                                                                                                                                                                                                                                                                                                                                                                                                                                                                                                                                                                                                                                                                                                                                                                                                                                                                                                                                                                                                                                                                                                                                                                                                                                                                                                                                                                                                                                                                                                                                                                                                                                                                                                                                                                                                                                                                                                                                                                                                                                                                                                                                                                                                                                                                                                                                                           |
| Embase | "myocardial ischemia".tw. or "heart muscle ischemia"/ or ("Myocardial Ischemias" or "Ischemic Heart Disease" or "Ischemic Heart Diseases").tw. or "coronary artery disease"/ or "coronary disease".tw. or ("Coronary Diseases" or "Coronary Heart Diseases" or "Coronary Heart Disease").tw. or ("Coronary Artery Diseases" or "Left Main Coronary Artery Disease" or "Left Main Disease" or "Left Main Diseases" or "Left Main Coronary Disease" or "Coronary Arteriosclerosis" or "Coronary Arterioscleroses" or "Coronary Atheroscleroses" or "Coronary Atherosclerosis").tw. or "Coronary Heart Disease".tw. or "ischemic heart disease"/ or "myocardial infarction".tw. or "heart infarction"/ or ("Myocardial Infarctions" or "Cardiovascular Stroke" or "Cardiovascular Strokes" or "Myocardial Infarct" or "Myocardial Infarcts" or "Heart Attack" or "Heart Attacks").tw. or "angina pectoris".tw. or "angina pectoris"/ or "acute coronary syndrome".tw. or "heart arrest".tw. or "heart arrest"/ or ("Cardiac Arrest" or Asystole or Asystoles or "Cardiopulmonary Arrest").tw. or "death sudden cardiac".tw. or "sudden cardiac death"/ or ("Sudden Cardiac Death" or "Cardiac Sudden Death" or "Sudden Cardiac Arrest").tw. or "cardiovascular mortality".tw. or "cardiovascular mortality"/ or stroke.tw. or "cerebrovascular accident"/ or (Strokes or "Cerebrovascular Accident" or "Cerebrovascular Accidents" or "Cerebrovascular Apoplexy" or "Brain Vascular Accident" or "Brain Vascular Accidents" or "Cerebrovascular Stroke" or "Cerebrovascular Strokes" or Apoplexy or "Cerebral Stroke" or "Cerebral Strokes" or "Acute Stroke" or "Acute Strokes" or "Acute Cerebrovascular Accident" or "Acute Cerebrovascular Accidents" or "brain attack").tw. or "brain infarction".tw. or "brain infarction"/ or ("Brain Infarctions" or "Brain Infarct" or "Brain Infarcts" or "Anterior Circulation Brain Infarction" or "Brain Venous Infarction" or "Brain Venous Infarctions" or "Venous Brain Infarction" or "Venous Brain Infarctions" or "Anterior Cerebral Circulation Infarction" or "Posterior Circulation Brain Infarction").tw. or "ischemic stroke".tw. or "ischemic stroke"/ or "brain ischemia"/ or "carotid artery disease".tw. or "carotid artery disease"/ or "cerebral small vessel disease".tw. or "intracranial artery disease".tw. or "cerebral arterial diseases".tw. or "cerebral artery disease"/ or "intracranial arteriosclerosis".tw. or "brain atherosclerosis"/ or ("Intracranial Arterioscleroses" or "Intracranial Atherosclerosis" or "Intracranial Atheroscleroses" or "Cerebral Arteriosclerosis" or "Cerebral Arterioscleroses" or "Cerebral Atherosclerosis" or "Cerebral Atheroscleroses").tw. or "intracranial embolism".tw. or "brain embolism"/ or ("Cerebral Embolism and Thrombosis" or "Brain Embolism and Thrombosis").tw. or ("cerebral infarction" or "cerebral ischaemia" or "brain ischaemia").tw. |
|        | AND                                                                                                                                                                                                                                                                                                                                                                                                                                                                                                                                                                                                                                                                                                                                                                                                                                                                                                                                                                                                                                                                                                                                                                                                                                                                                                                                                                                                                                                                                                                                                                                                                                                                                                                                                                                                                                                                                                                                                                                                                                                                                                                                                                                                                                                                                                                                                                                                                                                                                                                                                                                                                                                                                                                                                                                                                                                                                                                                                                   |
|        | "vegetarian diet".tw. or "vegetarian diet"/ or ("Vegetarian Diets" or "Vegetarian Diet" or "Lacto-Vegetarian Diet" or "Lacto Vegetarian Diet" or "Lacto-Vegetarian Diets" or "Plant-Based Diet" or "Plant Based Diet" or "Plant-Based Diets" or "Plant-Based Nutrition" or "Plant Based Nutrition" or "plant based diet" or "Lacto-Ovo Vegetarian Diet" or "Lacto Ovo Vegetarian Diet" or "Lacto-Ovo Vegetarian Diets" or Vegetarianism).tw. or vegetarians.tw. or vegetarian/ or vegetarian.tw. or ("Lacto-Ovo Vegetarians" or "Lacto Ovo Vegetarians" or "Lacto-Ovo Vegetarian" or "Ovo-Lacto                                                                                                                                                                                                                                                                                                                                                                                                                                                                                                                                                                                                                                                                                                                                                                                                                                                                                                                                                                                                                                                                                                                                                                                                                                                                                                                                                                                                                                                                                                                                                                                                                                                                                                                                                                                                                                                                                                                                                                                                                                                                                                                                                                                                                                                                                                                                                                       |

|        |                                                                                                                                                                                                                                                                                                                                                                                                                                                                                                                                                                                                                                                                                                                                                                                                                                                                                                                                                                                                                                                                                                                                                                                                                                                                                                                                                                                                                                                                                                                                                                                                                                                                                                                                                                                                                                                                                                                                                                                                                                                                                                                                                                                                                                                                       |
|--------|-----------------------------------------------------------------------------------------------------------------------------------------------------------------------------------------------------------------------------------------------------------------------------------------------------------------------------------------------------------------------------------------------------------------------------------------------------------------------------------------------------------------------------------------------------------------------------------------------------------------------------------------------------------------------------------------------------------------------------------------------------------------------------------------------------------------------------------------------------------------------------------------------------------------------------------------------------------------------------------------------------------------------------------------------------------------------------------------------------------------------------------------------------------------------------------------------------------------------------------------------------------------------------------------------------------------------------------------------------------------------------------------------------------------------------------------------------------------------------------------------------------------------------------------------------------------------------------------------------------------------------------------------------------------------------------------------------------------------------------------------------------------------------------------------------------------------------------------------------------------------------------------------------------------------------------------------------------------------------------------------------------------------------------------------------------------------------------------------------------------------------------------------------------------------------------------------------------------------------------------------------------------------|
|        | Vegetarians" or "Ovo Lacto Vegetarians" or "Ovo-Lacto Vegetarian").tw. or "vegan diet"/ or "Diet, Vegan".tw. or "Vegan Diets".tw. or "Vegan Diet".tw. or Veganism.tw. or vegans/ or vegans.tw. or vegan.tw. or "Seventh Day Adventists".tw. or "Seventh-day Adventist"/ or "Seventh-Day Adventists".tw. or "Seventh-Day Adventist".tw. or "Western diet"/ or "Diet, Western".tw. or "Mediterranean diet"/ or "Mediterranean diet".tw. or "feeding behavior".tw. or "feeding behavior"/ or "Feeding Behaviors".tw. or "Eating Behavior".tw. or "Eating Behaviors".tw. or "Feeding-Related Behavior".tw. or "Feeding Related Behavior".tw. or "Feeding-Related Behaviors".tw. or "Feeding Patterns".tw. or "Feeding Pattern".tw. or "Food Habits".tw. or "Food Habit".tw. or "Eating Habits".tw. or "Eating Habit".tw. or "Dietary Habits".tw. or "Dietary Habit".tw. or "Diet Habits".tw. or "Diet Habit".tw. or "eating habit"/ or "eating habit".tw. or "dietary pattern".tw. or "dietary pattern".tw. or "eating pattern".tw. or "food pattern".tw.                                                                                                                                                                                                                                                                                                                                                                                                                                                                                                                                                                                                                                                                                                                                                                                                                                                                                                                                                                                                                                                                                                                                                                                                                 |
|        | AND                                                                                                                                                                                                                                                                                                                                                                                                                                                                                                                                                                                                                                                                                                                                                                                                                                                                                                                                                                                                                                                                                                                                                                                                                                                                                                                                                                                                                                                                                                                                                                                                                                                                                                                                                                                                                                                                                                                                                                                                                                                                                                                                                                                                                                                                   |
|        | <ol style="list-style-type: none"> <li>1. (systematic review or meta-analysis).pt.</li> <li>2. meta-analysis/ or systematic review/ or systematic reviews as topic/ or meta-analysis as topic/ or "meta analysis (topic)"/ or "systematic review (topic)"/ or exp technology assessment, biomedical/ or network meta-analysis/</li> <li>3. ((systematic* adj3 (review* or overview*)) or (methodologic* adj3 (review* or overview*))).ti,ab,kf.</li> <li>4. ((quantitative adj3 (review* or overview* or syntheses*)) or (research adj3 (integrati* or overview*))).ti,ab,kf.</li> <li>5. ((integrative adj3 (review* or overview*)) or (collaborative adj3 (review* or overview*)) or (pool* adj3 analy*)).ti,ab,kf.</li> <li>6. (data syntheses* or data extraction* or data abstraction*).ti,ab,kf.</li> <li>7. (handsearch* or hand search*).ti,ab,kf.</li> <li>8. (mantel haenszel or peto or der simonian or dersimonian or fixed effect* or latin square*).ti,ab,kf.</li> <li>9. (met analy* or metanaly* or technology assessment* or HTA or HTAs or technology overview* or technology appraisal*).ti,ab,kf.</li> <li>10. (meta regression* or metaregression*).ti,ab,kf.</li> <li>11. (meta-analy* or metaanaly* or systematic review* or biomedical technology assessment* or bio-medical technology assessment*).mp,hw.</li> <li>12. (medline or cochrane or pubmed or medlars or embase or cinahl).ti,ab,hw.</li> <li>13. (cochrane or (health adj2 technology assessment) or evidence report).jw.</li> <li>14. (comparative adj3 (efficacy or effectiveness)).ti,ab,kf.</li> <li>15. (outcomes research or relative effectiveness).ti,ab,kf.</li> <li>16. ((indirect or indirect treatment or mixed-treatment or bayesian) adj3 comparison*).ti,ab,kf.</li> <li>17. (meta-analysis or systematic review).md.</li> <li>18. (multi* adj3 treatment adj3 comparison*).ti,ab,kf.</li> <li>19. (mixed adj3 treatment adj3 (meta-analy* or metaanaly*)).ti,ab,kf.</li> <li>20. umbrella review*.ti,ab,kf.</li> <li>21. (multi* adj2 paramet* adj2 evidence adj2 synthesis).ti,ab,kf.</li> <li>22. (multiparamet* adj2 evidence adj2 synthesis).ti,ab,kf.</li> <li>23. (multi-paramet* adj2 evidence adj2 synthesis).ti,ab,kf.</li> <li>24. or/1-23</li> </ol> |
| CINHAL | ((MH "myocardial ischemia+") OR (TI "myocardial ischaemia" OR AB "myocardial ischaemia") OR (TI "ischemia myocardial" OR AB "ischemia myocardial") OR (TI "ischemias myocardial" OR AB "ischemias myocardial") OR (TI "Myocardial Ischemias" OR AB "Myocardial Ischemias") OR (TI "Ischemic Heart Disease" OR AB                                                                                                                                                                                                                                                                                                                                                                                                                                                                                                                                                                                                                                                                                                                                                                                                                                                                                                                                                                                                                                                                                                                                                                                                                                                                                                                                                                                                                                                                                                                                                                                                                                                                                                                                                                                                                                                                                                                                                      |

|  |                                                                                                                                                                                                                                                                                                                                                                                                                                                                                                                                                                                                                                                                                                                                                                                                                                                                                                                                                                                                                                                                                                                                                                                                                                                                                                                                                                                                                                                                                                                                                                                                                                                                                                                                                                                                                                                                                                                                                                                                                                                                                                                                                                                                                                                                                                                                                                                                                                                                                                                                                                                                                                                                                                                                                                                                                                                                                                                                                                                                                                                                                                                                                                                                                                                                                                                                                                                                                                                                                                                                                                                                                                                                                                                                                                                                                                                                                                                                                                                                                                                                                                                                                                                                                                                                                           |
|--|-------------------------------------------------------------------------------------------------------------------------------------------------------------------------------------------------------------------------------------------------------------------------------------------------------------------------------------------------------------------------------------------------------------------------------------------------------------------------------------------------------------------------------------------------------------------------------------------------------------------------------------------------------------------------------------------------------------------------------------------------------------------------------------------------------------------------------------------------------------------------------------------------------------------------------------------------------------------------------------------------------------------------------------------------------------------------------------------------------------------------------------------------------------------------------------------------------------------------------------------------------------------------------------------------------------------------------------------------------------------------------------------------------------------------------------------------------------------------------------------------------------------------------------------------------------------------------------------------------------------------------------------------------------------------------------------------------------------------------------------------------------------------------------------------------------------------------------------------------------------------------------------------------------------------------------------------------------------------------------------------------------------------------------------------------------------------------------------------------------------------------------------------------------------------------------------------------------------------------------------------------------------------------------------------------------------------------------------------------------------------------------------------------------------------------------------------------------------------------------------------------------------------------------------------------------------------------------------------------------------------------------------------------------------------------------------------------------------------------------------------------------------------------------------------------------------------------------------------------------------------------------------------------------------------------------------------------------------------------------------------------------------------------------------------------------------------------------------------------------------------------------------------------------------------------------------------------------------------------------------------------------------------------------------------------------------------------------------------------------------------------------------------------------------------------------------------------------------------------------------------------------------------------------------------------------------------------------------------------------------------------------------------------------------------------------------------------------------------------------------------------------------------------------------------------------------------------------------------------------------------------------------------------------------------------------------------------------------------------------------------------------------------------------------------------------------------------------------------------------------------------------------------------------------------------------------------------------------------------------------------------------------------------------------|
|  | <p>"Ischemic Heart Disease") OR (TI "heart disease ischemic" OR AB "heart disease ischemic") OR (TI "disease ischemic heart" OR AB "disease ischemic heart") OR (TI "diseases ischemic heart" OR AB "diseases ischemic heart") OR (TI "heart diseases ischemic" OR AB "heart diseases ischemic") OR (TI "Ischemic Heart Diseases" OR AB "Ischemic Heart Diseases") OR (MH "coronary disease+") OR (TI "coronary disease" OR AB "coronary disease") OR (TI "Coronary Diseases" OR AB "Coronary Diseases") OR (TI "disease coronary" OR AB "disease coronary") OR (TI "diseases coronary" OR AB "diseases coronary") OR (TI "Coronary Heart Disease" OR AB "Coronary Heart Disease") OR (TI "Coronary Heart Diseases" OR AB "Coronary Heart Diseases") OR (TI "disease coronary heart" OR AB "disease coronary heart") OR (TI "diseases coronary heart" OR AB "diseases coronary heart") OR (TI "heart disease coronary" OR AB "heart disease coronary") OR (TI "heart diseases coronary" OR AB "heart diseases coronary") OR (MH "coronary artery disease+") OR (TI "coronary artery disease" OR AB "coronary artery disease") OR (TI "artery disease coronary" OR AB "artery disease coronary") OR (TI "artery diseases coronary" OR AB "artery diseases coronary") OR (TI "Coronary Artery Diseases" OR AB "Coronary Artery Diseases") OR (TI "Left Main Coronary Artery Disease" OR AB "Left Main Coronary Artery Disease") OR (TI "Left Main Disease" OR AB "Left Main Disease") OR (TI "Left Main Diseases" OR AB "Left Main Diseases") OR (TI "Left Main Coronary Disease" OR AB "Left Main Coronary Disease") OR (TI "Coronary Arteriosclerosis" OR AB "Coronary Arteriosclerosis") OR (TI "atherosclerosis coronary" OR AB "atherosclerosis coronary") OR (TI "Coronary Atherosclerosis" OR AB "Coronary Atherosclerosis") OR (TI "arteriosclerosis coronary" OR AB "arteriosclerosis coronary") OR (TI "Coronary Heart Disease" OR AB "Coronary Heart Disease") OR (MH "Myocardial Infarction+") OR (TI "Myocardial Infarction" OR AB "Myocardial Infarction") OR (TI "infarction myocardial" OR AB "infarction myocardial") OR (TI "infarctions myocardial" OR AB "infarctions myocardial") OR (TI "Myocardial Infarctions" OR AB "Myocardial Infarctions") OR (TI "Cardiovascular Stroke" OR AB "Cardiovascular Stroke") OR (TI "stroke cardiovascular" OR AB "stroke cardiovascular") OR (TI "strokes cardiovascular" OR AB "strokes cardiovascular") OR (TI "Myocardial Infarct" OR AB "Myocardial Infarct") OR (TI "infarct myocardial" OR AB "infarct myocardial") OR (TI "infarcts myocardial" OR AB "infarcts myocardial") OR (TI "Myocardial Infarcts" OR AB "Myocardial Infarcts") OR (TI "Heart Attack" OR AB "Heart Attack") OR (TI "Heart Attacks" OR AB "Heart Attacks") OR (MH "acute coronary syndrome+") OR (MH "angina pectoris+") OR (TI "acute coronary syndrome" OR AB "acute coronary syndrome") OR (TI "angina pectoris" OR AB "angina pectoris") OR (MH "Heart Arrest+") OR (TI "Heart Arrest" OR AB "Heart Arrest") OR (TI "arrest heart" OR AB "arrest heart") OR (TI "Cardiac Arrest" OR AB "Cardiac Arrest") OR (TI "arrest cardiac" OR AB "arrest cardiac") OR (TI Asystole OR AB Asystole) OR (TI Asystoles OR AB Asystoles) OR (TI "Cardiopulmonary Arrest" OR AB "Cardiopulmonary Arrest") OR (TI "arrest cardiopulmonary" OR AB "arrest cardiopulmonary") OR (MH "death, sudden, cardiac+") OR (TI "death sudden cardiac" OR AB "death sudden cardiac") OR (TI "Sudden Cardiac Death" OR AB "Sudden Cardiac Death") OR (TI "cardiac death sudden" OR AB "cardiac death sudden") OR (TI "death sudden cardiac" OR AB "death sudden cardiac") OR (TI "Cardiac Sudden Death" OR AB "Cardiac Sudden Death") OR (TI "death cardiac sudden" OR AB "death cardiac sudden") OR (TI "sudden death cardiac" OR AB "sudden death cardiac") OR (TI "Sudden Cardiac Arrest" OR AB "Sudden Cardiac Arrest") OR (TI "arrest sudden cardiac" OR AB "arrest sudden cardiac") OR (TI "cardiac arrest sudden" OR AB "cardiac arrest sudden") OR (TI "cardiovascular mortality" OR AB "cardiovascular mortality") OR (TI "cardiovascular death" OR AB "cardiovascular death") OR (MH stroke+) OR "Cerebrovascular Accident" OR (TI Strokes OR AB Strokes) OR (TI</p> |
|--|-------------------------------------------------------------------------------------------------------------------------------------------------------------------------------------------------------------------------------------------------------------------------------------------------------------------------------------------------------------------------------------------------------------------------------------------------------------------------------------------------------------------------------------------------------------------------------------------------------------------------------------------------------------------------------------------------------------------------------------------------------------------------------------------------------------------------------------------------------------------------------------------------------------------------------------------------------------------------------------------------------------------------------------------------------------------------------------------------------------------------------------------------------------------------------------------------------------------------------------------------------------------------------------------------------------------------------------------------------------------------------------------------------------------------------------------------------------------------------------------------------------------------------------------------------------------------------------------------------------------------------------------------------------------------------------------------------------------------------------------------------------------------------------------------------------------------------------------------------------------------------------------------------------------------------------------------------------------------------------------------------------------------------------------------------------------------------------------------------------------------------------------------------------------------------------------------------------------------------------------------------------------------------------------------------------------------------------------------------------------------------------------------------------------------------------------------------------------------------------------------------------------------------------------------------------------------------------------------------------------------------------------------------------------------------------------------------------------------------------------------------------------------------------------------------------------------------------------------------------------------------------------------------------------------------------------------------------------------------------------------------------------------------------------------------------------------------------------------------------------------------------------------------------------------------------------------------------------------------------------------------------------------------------------------------------------------------------------------------------------------------------------------------------------------------------------------------------------------------------------------------------------------------------------------------------------------------------------------------------------------------------------------------------------------------------------------------------------------------------------------------------------------------------------------------------------------------------------------------------------------------------------------------------------------------------------------------------------------------------------------------------------------------------------------------------------------------------------------------------------------------------------------------------------------------------------------------------------------------------------------------------------------------------------|



|  |                                                                                                                                                                                                                                                                                                                                                                                                                                                                                                                                                                                                                                                                                                                                                                                                                                                                                                                                                                                                                                                                                                                                                                                                                                                                                                                                                                                                                                                                                                                                                                                                                                                                                                                                                                                                                                                                                                                                                                                                                                                                                                                                                                                                                                                                                                                                                                                                                                                                                                                                                                                                                                                                                                                                                                                                                                                                                                                                                                                                                                                                                                                                                                                                                                                                                                                                                                                                                                                                                                                                                                                                                                                                                                                                                                                                                                                                                                                                                                                                                                                                                                                                                                                                                                                                                         |
|--|-----------------------------------------------------------------------------------------------------------------------------------------------------------------------------------------------------------------------------------------------------------------------------------------------------------------------------------------------------------------------------------------------------------------------------------------------------------------------------------------------------------------------------------------------------------------------------------------------------------------------------------------------------------------------------------------------------------------------------------------------------------------------------------------------------------------------------------------------------------------------------------------------------------------------------------------------------------------------------------------------------------------------------------------------------------------------------------------------------------------------------------------------------------------------------------------------------------------------------------------------------------------------------------------------------------------------------------------------------------------------------------------------------------------------------------------------------------------------------------------------------------------------------------------------------------------------------------------------------------------------------------------------------------------------------------------------------------------------------------------------------------------------------------------------------------------------------------------------------------------------------------------------------------------------------------------------------------------------------------------------------------------------------------------------------------------------------------------------------------------------------------------------------------------------------------------------------------------------------------------------------------------------------------------------------------------------------------------------------------------------------------------------------------------------------------------------------------------------------------------------------------------------------------------------------------------------------------------------------------------------------------------------------------------------------------------------------------------------------------------------------------------------------------------------------------------------------------------------------------------------------------------------------------------------------------------------------------------------------------------------------------------------------------------------------------------------------------------------------------------------------------------------------------------------------------------------------------------------------------------------------------------------------------------------------------------------------------------------------------------------------------------------------------------------------------------------------------------------------------------------------------------------------------------------------------------------------------------------------------------------------------------------------------------------------------------------------------------------------------------------------------------------------------------------------------------------------------------------------------------------------------------------------------------------------------------------------------------------------------------------------------------------------------------------------------------------------------------------------------------------------------------------------------------------------------------------------------------------------------------------------------------------------------------|
|  | <p>"Cerebrovascular Accident" OR AB "Cerebrovascular Accident") OR (TI "Cerebrovascular Accidents" OR AB "Cerebrovascular Accidents") OR (TI "cva cerebrovascular accident" OR AB "cva cerebrovascular accident") OR (TI "Cerebrovascular Apoplexy" OR AB "Cerebrovascular Apoplexy") OR (TI "apoplexy cerebrovascular" OR AB "apoplexy cerebrovascular") OR (TI "vascular accident brain" OR AB "vascular accident brain") OR (TI "Brain Vascular Accident" OR AB "Brain Vascular Accident") OR (TI "Brain Vascular Accidents" OR AB "Brain Vascular Accidents") OR (TI "Cerebrovascular Stroke" OR AB "Cerebrovascular Stroke") OR (TI "Cerebrovascular Strokes" OR AB "Cerebrovascular Strokes") OR (TI "stroke cerebrovascular" OR AB "stroke cerebrovascular") OR (TI "strokes cerebrovascular" OR AB "strokes cerebrovascular") OR (TI Apoplexy OR AB Apoplexy) OR (TI "Cerebral Stroke" OR AB "Cerebral Stroke") OR (TI "Cerebral Strokes" OR AB "Cerebral Strokes") OR (TI "stroke cerebral" OR AB "stroke cerebral") OR (TI "strokes cerebral" OR AB "strokes cerebral") OR (TI "stroke acute" OR AB "stroke acute") OR (TI "Acute Stroke" OR AB "Acute Stroke") OR (TI "Acute Strokes" OR AB "Acute Strokes") OR (TI "strokes acute" OR AB "strokes acute") OR (TI "cerebrovascular accident acute" OR AB "cerebrovascular accident acute") OR (TI "Acute Cerebrovascular Accident" OR AB "Acute Cerebrovascular Accident") OR (TI "Acute Cerebrovascular Accidents" OR AB "Acute Cerebrovascular Accidents") OR (TI "cerebrovascular accidents acute" OR AB "cerebrovascular accidents acute") OR (TI "brain attack" OR AB "brain attack") OR (MH "brain infarction+") OR (TI "brain infarction" OR AB "brain infarction") OR (TI "Brain Infarctions" OR AB "Brain Infarctions") OR (TI "infarction brain" OR AB "infarction brain") OR (TI "infarctions brain" OR AB "infarctions brain") OR (TI "Brain Infarct" OR AB "Brain Infarct") OR (TI "Brain Infarcts" OR AB "Brain Infarcts") OR (TI "infarct brain" OR AB "infarct brain") OR (TI "infarcts brain" OR AB "infarcts brain") OR (TI "Anterior Circulation Brain Infarction" OR AB "Anterior Circulation Brain Infarction") OR (TI "venous infarction brain" OR AB "venous infarction brain") OR (TI "Brain Venous Infarction" OR AB "Brain Venous Infarction") OR (TI "venous infarctions brain" OR AB "venous infarctions brain") OR (TI "Venous Brain Infarctions" OR AB "Venous Brain Infarctions") OR (TI "Anterior Cerebral Circulation Infarction" OR AB "Anterior Cerebral Circulation Infarction") OR (TI "brain infarction posterior circulation" OR AB "brain infarction posterior circulation") OR (TI "Posterior Circulation Brain Infarction" OR AB "Posterior Circulation Brain Infarction") OR (MH "Ischemic Stroke+") OR (TI "Ischemic Stroke" OR AB "Ischemic Stroke") OR (MH "carotid artery diseases+") OR (TI "carotid artery disease" OR AB "carotid artery disease") OR (MH "cerebral small vessel diseases+") OR (TI "cerebral small vessel disease" OR AB "cerebral small vessel disease") OR (TI "intracranial artery disease" OR AB "intracranial artery disease") OR (MH "cerebral arterial diseases+") OR (MH "intracranial arteriosclerosis+") OR (TI "arteriosclerosis intracranial" OR AB "arteriosclerosis intracranial") OR (TI "Intracranial Atherosclerosis" OR AB "Intracranial Atherosclerosis") OR (TI "atherosclerosis intracranial" OR AB "atherosclerosis intracranial") OR (TI "Cerebral Arteriosclerosis" OR AB "Cerebral Arteriosclerosis") OR (TI "arteriosclerosis cerebral" OR AB "arteriosclerosis cerebral") OR (TI "Cerebral Atherosclerosis" OR AB "Cerebral Atherosclerosis") OR (TI "atherosclerosis cerebral" OR AB "atherosclerosis cerebral") OR (MH "intracranial embolism and thrombosis+") OR (TI "Cerebral Embolism and Thrombosis" OR AB "Cerebral Embolism and Thrombosis") OR (MH "cerebral infarction+") OR (TI "cerebral ischemia" OR AB "cerebral ischemia") OR (TI "cerebral ischaemia" OR AB "cerebral ischaemia") OR (MH "brain ischemia+") OR (TI "brain ischaemia" OR AB "brain ischaemia")) AND ((MH "diet, vegetarian+") OR (TI "diet vegetarian" OR AB "diet vegetarian") OR (TI "diets vegetarian" OR AB "diets vegetarian") OR (TI</p> |
|--|-----------------------------------------------------------------------------------------------------------------------------------------------------------------------------------------------------------------------------------------------------------------------------------------------------------------------------------------------------------------------------------------------------------------------------------------------------------------------------------------------------------------------------------------------------------------------------------------------------------------------------------------------------------------------------------------------------------------------------------------------------------------------------------------------------------------------------------------------------------------------------------------------------------------------------------------------------------------------------------------------------------------------------------------------------------------------------------------------------------------------------------------------------------------------------------------------------------------------------------------------------------------------------------------------------------------------------------------------------------------------------------------------------------------------------------------------------------------------------------------------------------------------------------------------------------------------------------------------------------------------------------------------------------------------------------------------------------------------------------------------------------------------------------------------------------------------------------------------------------------------------------------------------------------------------------------------------------------------------------------------------------------------------------------------------------------------------------------------------------------------------------------------------------------------------------------------------------------------------------------------------------------------------------------------------------------------------------------------------------------------------------------------------------------------------------------------------------------------------------------------------------------------------------------------------------------------------------------------------------------------------------------------------------------------------------------------------------------------------------------------------------------------------------------------------------------------------------------------------------------------------------------------------------------------------------------------------------------------------------------------------------------------------------------------------------------------------------------------------------------------------------------------------------------------------------------------------------------------------------------------------------------------------------------------------------------------------------------------------------------------------------------------------------------------------------------------------------------------------------------------------------------------------------------------------------------------------------------------------------------------------------------------------------------------------------------------------------------------------------------------------------------------------------------------------------------------------------------------------------------------------------------------------------------------------------------------------------------------------------------------------------------------------------------------------------------------------------------------------------------------------------------------------------------------------------------------------------------------------------------------------------------------------------------|

|  |                                                                                                                                                                                                                                                                                                                                                                                                                                                                                                                                                                                                                                                                                                                                                                                                                                                                                                                                                                                                                                                                                                                                                                                                                                                                                                                                                                                                                                                                                                                                                                                                                                                                                                                                                                                                                                                                                                                                                                                                                                                                                                                                                                                                                                                                                                                                                                                                                                                                                                                                                                                                                                                                                                                                                                                                                                                                                                                                                                                                                                                                                                                                                                                                                                                                                                                                                                                                                                                                                                                                                                                                                                                                                                                                                                                                                                                                                                                                                                                                                                                            |
|--|------------------------------------------------------------------------------------------------------------------------------------------------------------------------------------------------------------------------------------------------------------------------------------------------------------------------------------------------------------------------------------------------------------------------------------------------------------------------------------------------------------------------------------------------------------------------------------------------------------------------------------------------------------------------------------------------------------------------------------------------------------------------------------------------------------------------------------------------------------------------------------------------------------------------------------------------------------------------------------------------------------------------------------------------------------------------------------------------------------------------------------------------------------------------------------------------------------------------------------------------------------------------------------------------------------------------------------------------------------------------------------------------------------------------------------------------------------------------------------------------------------------------------------------------------------------------------------------------------------------------------------------------------------------------------------------------------------------------------------------------------------------------------------------------------------------------------------------------------------------------------------------------------------------------------------------------------------------------------------------------------------------------------------------------------------------------------------------------------------------------------------------------------------------------------------------------------------------------------------------------------------------------------------------------------------------------------------------------------------------------------------------------------------------------------------------------------------------------------------------------------------------------------------------------------------------------------------------------------------------------------------------------------------------------------------------------------------------------------------------------------------------------------------------------------------------------------------------------------------------------------------------------------------------------------------------------------------------------------------------------------------------------------------------------------------------------------------------------------------------------------------------------------------------------------------------------------------------------------------------------------------------------------------------------------------------------------------------------------------------------------------------------------------------------------------------------------------------------------------------------------------------------------------------------------------------------------------------------------------------------------------------------------------------------------------------------------------------------------------------------------------------------------------------------------------------------------------------------------------------------------------------------------------------------------------------------------------------------------------------------------------------------------------------------------------|
|  | <p>"Vegetarian Diets" OR AB "Vegetarian Diets") OR (TI "Vegetarian Diet" OR AB "Vegetarian Diet") OR (TI "lacto vegetarian diet" OR AB "lacto vegetarian diet") OR (TI "lacto vegetarian diet" OR AB "lacto vegetarian diet") OR (TI "Lacto-Vegetarian Diets" OR AB "Lacto-Vegetarian Diets") OR (TI "plant based diet" OR AB "plant based diet") OR (TI "diets plant based" OR AB "diets plant based") OR (TI "plant based diet" OR AB "plant based diet") OR (TI "Plant-Based Diets" OR AB "Plant-Based Diets") OR (TI "diet plant based" OR AB "diet plant based") OR (TI "diet plant based" OR AB "diet plant based") OR (TI "plant based nutrition" OR AB "plant based nutrition") OR (TI "nutrition plant based" OR AB "nutrition plant based") OR (TI "plant based nutrition" OR AB "plant based nutrition") OR (TI "lacto ovo vegetarian diet" OR AB "lacto ovo vegetarian diet") OR (TI "diet lacto ovo vegetarian" OR AB "diet lacto ovo vegetarian") OR (TI "diets lacto ovo vegetarian" OR AB "diets lacto ovo vegetarian") OR (TI "lacto ovo vegetarian diet" OR AB "lacto ovo vegetarian diet") OR (TI "Lacto-Ovo Vegetarian Diets" OR AB "Lacto-Ovo Vegetarian Diets") OR (TI Vegetarianism OR AB Vegetarianism) OR (MH Vegetarians+) OR (TI Vegetarian OR AB Vegetarian) OR (TI Vegetarians OR AB Vegetarians) OR (TI Vegetarian OR AB Vegetarian) OR (TI "lacto ovo vegetarians" OR AB "lacto ovo vegetarians") OR (TI "lacto ovo vegetarians" OR AB "lacto ovo vegetarians") OR (TI "Lacto-Ovo Vegetarian" OR AB "Lacto-Ovo Vegetarian") OR (TI "vegetarian lacto ovo" OR AB "vegetarian lacto ovo") OR (TI "vegetarians lacto ovo" OR AB "vegetarians lacto ovo") OR (TI "ovo lacto vegetarians" OR AB "ovo lacto vegetarians") OR (TI "ovo lacto vegetarians" OR AB "ovo lacto vegetarians") OR (TI "Ovo-Lacto Vegetarian" OR AB "Ovo-Lacto Vegetarian") OR (MH "diet, vegan+") OR (TI "diet vegan" OR AB "diet vegan") OR (TI "diets vegan" OR AB "diets vegan") OR (TI "Vegan Diets" OR AB "Vegan Diets") OR (TI "Vegan Diet" OR AB "Vegan Diet") OR (TI Veganism OR AB Veganism) OR (MH vegans+) OR (TI vegans OR AB vegans) OR (TI vegan OR AB vegan) OR (TI "seventh day adventists" OR AB "seventh day adventists") OR (TI "seventh day adventists" OR AB "seventh day adventists") OR (TI "Seventh-Day Adventist" OR AB "Seventh-Day Adventist") OR (MH "diet, western+") OR (TI "diet western" OR AB "diet western") OR (MH "diet, mediterranean+") OR (TI "mediterranean diet" OR AB "mediterranean diet") OR (TI "mediterranean diet" OR AB "mediterranean diet") OR (MH "Feeding Behavior+") OR (TI "Feeding Behavior" OR AB "Feeding Behavior") OR (TI "behavior feeding" OR AB "behavior feeding") OR (TI "Feeding Behaviors" OR AB "Feeding Behaviors") OR (TI "Eating Behavior" OR AB "Eating Behavior") OR (TI "behavior eating" OR AB "behavior eating") OR (TI "Eating Behaviors" OR AB "Eating Behaviors") OR (TI "feeding related behavior" OR AB "feeding related behavior") OR (TI "feeding related behavior" OR AB "feeding related behavior") OR (TI "Feeding-Related Behaviors" OR AB "Feeding-Related Behaviors") OR (TI "Feeding Patterns" OR AB "Feeding Patterns") OR (TI "Feeding Pattern" OR AB "Feeding Pattern") OR (TI "pattern feeding" OR AB "pattern feeding") OR (TI "Food Habits" OR AB "Food Habits") OR (TI "Food Habit" OR AB "Food Habit") OR (TI "habit food" OR AB "habit food") OR (TI "Eating Habits" OR AB "Eating Habits") OR (TI "Eating Habit" OR AB "Eating Habit") OR (TI "habit eating" OR AB "habit eating") OR (TI "Dietary Habits" OR AB "Dietary Habits") OR (TI "Dietary Habit" OR AB "Dietary Habit") OR (TI "habit dietary" OR AB "habit dietary") OR (TI "Diet Habits" OR AB "Diet Habits") OR (TI "Diet Habit" OR AB "Diet Habit") OR (TI "habit diet" OR AB "habit diet") OR (TI "habits diet" OR AB "habits diet") OR (TI "dietary pattern" OR AB "dietary pattern") OR (TI "eating pattern" OR AB "eating pattern") OR (TI "food pattern" OR AB "food pattern"))</p> |
|  | AND                                                                                                                                                                                                                                                                                                                                                                                                                                                                                                                                                                                                                                                                                                                                                                                                                                                                                                                                                                                                                                                                                                                                                                                                                                                                                                                                                                                                                                                                                                                                                                                                                                                                                                                                                                                                                                                                                                                                                                                                                                                                                                                                                                                                                                                                                                                                                                                                                                                                                                                                                                                                                                                                                                                                                                                                                                                                                                                                                                                                                                                                                                                                                                                                                                                                                                                                                                                                                                                                                                                                                                                                                                                                                                                                                                                                                                                                                                                                                                                                                                                        |
|  | <p>(MH "meta analysis" OR MH "systematic review" OR MH "Technology, Medical/EV" OR PT "systematic review" OR PT "meta analysis" OR (((TI systematic* OR AB</p>                                                                                                                                                                                                                                                                                                                                                                                                                                                                                                                                                                                                                                                                                                                                                                                                                                                                                                                                                                                                                                                                                                                                                                                                                                                                                                                                                                                                                                                                                                                                                                                                                                                                                                                                                                                                                                                                                                                                                                                                                                                                                                                                                                                                                                                                                                                                                                                                                                                                                                                                                                                                                                                                                                                                                                                                                                                                                                                                                                                                                                                                                                                                                                                                                                                                                                                                                                                                                                                                                                                                                                                                                                                                                                                                                                                                                                                                                             |

|                |                                                                                                                                                                                                                                                                                                                                                                                                                                                                                                                                                                                                                                                                                                                                                                                                                                                                                                                                                                                                                                                                                                                                                                                                                                                                                                                                                                                                                                                                                                                                                                                                                                                                                                                                                                                                                                                                                                                                                                                                                                                                                                                                                                                                                                                                                                                                                                                                                                                                                                                                                                                                                                                                                                                                                                                                                                                                                                                                                                                                                                                                                                                                                                                                                                                                                                              |
|----------------|--------------------------------------------------------------------------------------------------------------------------------------------------------------------------------------------------------------------------------------------------------------------------------------------------------------------------------------------------------------------------------------------------------------------------------------------------------------------------------------------------------------------------------------------------------------------------------------------------------------------------------------------------------------------------------------------------------------------------------------------------------------------------------------------------------------------------------------------------------------------------------------------------------------------------------------------------------------------------------------------------------------------------------------------------------------------------------------------------------------------------------------------------------------------------------------------------------------------------------------------------------------------------------------------------------------------------------------------------------------------------------------------------------------------------------------------------------------------------------------------------------------------------------------------------------------------------------------------------------------------------------------------------------------------------------------------------------------------------------------------------------------------------------------------------------------------------------------------------------------------------------------------------------------------------------------------------------------------------------------------------------------------------------------------------------------------------------------------------------------------------------------------------------------------------------------------------------------------------------------------------------------------------------------------------------------------------------------------------------------------------------------------------------------------------------------------------------------------------------------------------------------------------------------------------------------------------------------------------------------------------------------------------------------------------------------------------------------------------------------------------------------------------------------------------------------------------------------------------------------------------------------------------------------------------------------------------------------------------------------------------------------------------------------------------------------------------------------------------------------------------------------------------------------------------------------------------------------------------------------------------------------------------------------------------------------|
|                | <p>systematic*) N3 ((TI review* OR AB review*) OR (TI overview* OR AB overview*)) OR ((TI methodologic* OR AB methodologic*) N3 ((TI review* OR AB review*) OR (TI overview* OR AB overview*))) OR (((TI quantitative OR AB quantitative) N3 ((TI review* OR AB review*) OR (TI overview* OR AB overview*) OR (TI synthes* OR AB synthes*))) OR ((TI research OR AB research) N3 ((TI integrati* OR AB integrati*) OR (TI overview* OR AB overview*))) OR (((TI integrative OR AB integrative) N3 ((TI review* OR AB review*) OR (TI overview* OR AB overview*))) OR ((TI collaborative OR AB collaborative) N3 ((TI review* OR AB review*) OR (TI overview* OR AB overview*))) OR ((TI pool* OR AB pool*) N3 (TI analy* OR AB analy*)) OR ((TI "data synthes*" OR AB "data synthes*") OR (TI "data extraction*" OR AB "data extraction*") OR (TI "data abstraction*" OR AB "data abstraction*")) OR ((TI handsearch* OR AB handsearch*) OR (TI "hand search*" OR AB "hand search*")) OR ((TI "mantel haenszel" OR AB "mantel haenszel") OR (TI peto OR AB peto) OR (TI "der simonian" OR AB "der simonian") OR (TI dersimonian OR AB dersimonian) OR (TI "fixed effect*" OR AB "fixed effect*") OR (TI "latin square*" OR AB "latin square*")) OR ((TI "met analy*" OR AB "met analy*") OR (TI metanaly* OR AB metanaly*) OR (TI "technology assessment*" OR AB "technology assessment*") OR (TI HTA OR AB HTA) OR (TI HTAs OR AB HTAs) OR (TI "technology overview*" OR AB "technology overview*") OR (TI "technology appraisal*" OR AB "technology appraisal*")) OR ((TI "meta regression*" OR AB "meta regression*") OR (TI metaregression* OR AB metaregression*)) OR (MW meta-analy* OR MW metaanaly* OR MW "systematic review*" OR MW "biomedical technology assessment*" OR MW "bio-medical technology assessment*") OR ((TI medline OR AB medline OR MW medline) OR (TI cochrane OR AB cochrane OR MW cochrane) OR (TI pubmed OR AB pubmed OR MW pubmed) OR (TI medlars OR AB medlars OR MW medlars) OR (TI embase OR AB embase OR MW embase) OR (TI cinahl OR AB cinahl OR MW cinahl)) OR (SO Cochrane OR SO health technology assessment OR SO evidence report) OR ((TI comparative OR AB comparative) N3 ((TI efficacy OR AB efficacy) OR (TI effectiveness OR AB effectiveness))) OR ((TI "outcomes research" OR AB "outcomes research") OR (TI "relative effectiveness" OR AB "relative effectiveness")) OR (((TI indirect OR AB indirect) OR (TI "indirect treatment" OR AB "indirect treatment") OR (TI mixed-treatment OR AB mixed-treatment) OR (TI bayesian OR AB bayesian)) N3 (TI comparison* OR AB comparison*)) OR ((TI multi* OR AB multi*) N3 (TI treatment OR AB treatment) N3 (TI comparison* OR AB comparison*)) OR ((TI mixed OR AB mixed) N3 (TI treatment OR AB treatment) N3 ((TI meta-analy* OR AB meta-analy*) OR (TI metaanaly* OR AB metaanaly*))) OR (TI "umbrella review*" OR AB "umbrella review*") OR ((TI multi* OR AB multi*) N2 (TI paramet* OR AB paramet*) N2 (TI evidence OR AB evidence) N2 (TI synthesis OR AB synthesis)) OR ((TI multiparamet* OR AB multiparamet*) N2 (TI evidence OR AB evidence) N2 (TI synthesis OR AB synthesis)) OR ((TI multi-paramet* OR AB multi-paramet*) N2 (TI evidence OR AB evidence) N2 (TI synthesis OR AB synthesis))</p> |
| Web of Science | <p>TI(("diet, vegetarian" OR "diet vegetarian" OR "diets vegetarian" OR "Vegetarian Diets" OR "Vegetarian Diet" OR "lacto vegetarian diet" OR "lacto vegetarian diet" OR "Lacto-Vegetarian Diets" OR "plant based diet" OR "diets plant based" OR "plant based diet" OR "Plant-Based Diets" OR "diet plant based" OR "diet plant based" OR "plant based nutrition" OR "nutrition plant based" OR "plant based nutrition" OR "lacto ovo vegetarian diet" OR "diet lacto ovo vegetarian" OR "diets lacto ovo vegetarian" OR "lacto ovo vegetarian diet" OR "Lacto-Ovo Vegetarian Diets" OR Vegetarianism OR Vegetarians OR Vegetarian OR Vegetarians OR Vegetarian OR "lacto ovo vegetarians" OR "lacto ovo vegetarians" OR "Lacto-Ovo Vegetarian" OR "vegetarian lacto ovo" OR "vegetarians lacto ovo" OR "ovo lacto vegetarians" OR "ovo lacto vegetarians" OR</p>                                                                                                                                                                                                                                                                                                                                                                                                                                                                                                                                                                                                                                                                                                                                                                                                                                                                                                                                                                                                                                                                                                                                                                                                                                                                                                                                                                                                                                                                                                                                                                                                                                                                                                                                                                                                                                                                                                                                                                                                                                                                                                                                                                                                                                                                                                                                                                                                                                           |

|  |                                                                                                                                                                                                                                                                                                                                                                                                                                                                                                                                                                                                                                                                                                                                                                                                                                                                                                                                                                                                                                                                                                                                                                                                                                                                                                                                                                                                                                                                                                                                                                                                                                                                                                                                                                                                                                                                                                                                                                                                                                                                                                                                                                                                                                                                                                                                                                                                                                                                                                                                                                                                                                                                                                                                                                                                                                                                                                                                                                                                                                                                                                                                               |
|--|-----------------------------------------------------------------------------------------------------------------------------------------------------------------------------------------------------------------------------------------------------------------------------------------------------------------------------------------------------------------------------------------------------------------------------------------------------------------------------------------------------------------------------------------------------------------------------------------------------------------------------------------------------------------------------------------------------------------------------------------------------------------------------------------------------------------------------------------------------------------------------------------------------------------------------------------------------------------------------------------------------------------------------------------------------------------------------------------------------------------------------------------------------------------------------------------------------------------------------------------------------------------------------------------------------------------------------------------------------------------------------------------------------------------------------------------------------------------------------------------------------------------------------------------------------------------------------------------------------------------------------------------------------------------------------------------------------------------------------------------------------------------------------------------------------------------------------------------------------------------------------------------------------------------------------------------------------------------------------------------------------------------------------------------------------------------------------------------------------------------------------------------------------------------------------------------------------------------------------------------------------------------------------------------------------------------------------------------------------------------------------------------------------------------------------------------------------------------------------------------------------------------------------------------------------------------------------------------------------------------------------------------------------------------------------------------------------------------------------------------------------------------------------------------------------------------------------------------------------------------------------------------------------------------------------------------------------------------------------------------------------------------------------------------------------------------------------------------------------------------------------------------------|
|  | "Ovo-Lacto Vegetarian" OR "diet, vegan" OR "diet vegan" OR "diets vegan" OR "Vegan Diets" OR "Vegan Diet" OR Veganism OR vegans OR vegans OR vegan OR "seventh day adventists" OR "seventh day adventists" OR "Seventh-Day Adventist" OR "diet, western" OR "diet western" OR "diet, mediterranean" OR "mediterranean diet" OR "mediterranean diet" OR "Feeding Behavior" OR "Feeding Behavior" OR "behavior feeding" OR "Feeding Behaviors" OR "Eating Behavior" OR "behavior eating" OR "Eating Behaviors" OR "feeding related behavior" OR "feeding related behavior" OR "Feeding-Related Behaviors" OR "Feeding Patterns" OR "Feeding Pattern" OR "pattern feeding" OR "Food Habits" OR "Food Habit" OR "habit food" OR "Eating Habits" OR "Eating Habit" OR "habit eating" OR "Dietary Habits" OR "Dietary Habit" OR "habit dietary" OR "Diet Habits" OR "Diet Habit" OR "habit diet" OR "habits diet" OR "dietary pattern" OR "eating pattern" OR "food pattern"))                                                                                                                                                                                                                                                                                                                                                                                                                                                                                                                                                                                                                                                                                                                                                                                                                                                                                                                                                                                                                                                                                                                                                                                                                                                                                                                                                                                                                                                                                                                                                                                                                                                                                                                                                                                                                                                                                                                                                                                                                                                                                                                                                                      |
|  | AND                                                                                                                                                                                                                                                                                                                                                                                                                                                                                                                                                                                                                                                                                                                                                                                                                                                                                                                                                                                                                                                                                                                                                                                                                                                                                                                                                                                                                                                                                                                                                                                                                                                                                                                                                                                                                                                                                                                                                                                                                                                                                                                                                                                                                                                                                                                                                                                                                                                                                                                                                                                                                                                                                                                                                                                                                                                                                                                                                                                                                                                                                                                                           |
|  | TI=((("myocardial ischemia" OR "myocardial ischaemia" OR "ischemia myocardial" OR "ischemias myocardial" OR "Myocardial Ischemias" OR "Ischemic Heart Disease" OR "heart disease ischemic" OR "disease ischemic heart" OR "diseases ischemic heart" OR "heart diseases ischemic" OR "Ischemic Heart Diseases" OR "coronary disease" OR "coronary disease" OR "Coronary Diseases" OR "disease coronary" OR "diseases coronary" OR "Coronary Heart Disease" OR "Coronary Heart Diseases" OR "disease coronary heart" OR "diseases coronary heart" OR "heart disease coronary" OR "heart diseases coronary" OR "coronary artery disease" OR "coronary artery disease" OR "artery disease coronary" OR "artery diseases coronary" OR "Coronary Artery Diseases" OR "Left Main Coronary Artery Disease" OR "Left Main Disease" OR "Left Main Diseases" OR "Left Main Coronary Disease" OR "Coronary Arteriosclerosis" OR "atherosclerosis coronary" OR "Coronary Atherosclerosis" OR "arteriosclerosis coronary" OR "Coronary Heart Disease" OR "Myocardial Infarction" OR "Myocardial Infarction" OR "infarction myocardial" OR "infarctions myocardial" OR "Myocardial Infarctions" OR "Cardiovascular Stroke" OR "stroke cardiovascular" OR "strokes cardiovascular" OR "Myocardial Infarct" OR "infarct myocardial" OR "infarcts myocardial" OR "Myocardial Infarcts" OR "Heart Attack" OR "Heart Attacks" OR "acute coronary syndrome" OR "angina pectoris" OR "acute coronary syndrome" OR "angina pectoris" OR "Heart Arrest" OR "Heart Arrest" OR "arrest heart" OR "Cardiac Arrest" OR "arrest cardiac" OR Asystole OR Asystoles OR "Cardiopulmonary Arrest" OR "arrest cardiopulmonary" OR "death, sudden, cardiac" OR "death sudden cardiac" OR "Sudden Cardiac Death" OR "cardiac death sudden" OR "death sudden cardiac" OR "Cardiac Sudden Death" OR "death cardiac sudden" OR "sudden death cardiac" OR "Sudden Cardiac Arrest" OR "arrest sudden cardiac" OR "cardiac arrest sudden" OR "cardiovascular mortality" OR "cardiovascular death" OR stroke OR "Cerebrovascular Accident" OR Strokes OR "Cerebrovascular Accident" OR "Cerebrovascular Accidents" OR "cva cerebrovascular accident" OR "Cerebrovascular Apoplexy" OR "apoplexy cerebrovascular" OR "vascular accident brain" OR "Brain Vascular Accident" OR "Brain Vascular Accidents" OR "Cerebrovascular Stroke" OR "Cerebrovascular Strokes" OR "stroke cerebrovascular" OR "strokes cerebrovascular" OR Apoplexy OR "Cerebral Stroke" OR "Cerebral Strokes" OR "stroke cerebral" OR "strokes cerebral" OR "stroke acute" OR "Acute Stroke" OR "Acute Strokes" OR "strokes acute" OR "cerebrovascular accident acute" OR "Acute Cerebrovascular Accident" OR "Acute Cerebrovascular Accidents" OR "cerebrovascular accidents acute" OR "brain attack" OR "brain infarction" OR "brain infarction" OR "Brain Infarctions" OR "infarction brain" OR "infarctions brain" OR "Brain Infarct" OR "Brain Infarcts" OR "infarct brain" OR "infarcts brain" OR "Anterior Circulation Brain Infarction" OR "venous infarction brain" OR "Brain Venous Infarction" OR "venous |

|          |                                                                                                                                                                                                                                                                                                                                                                                                                                                                                                                                                                                                                                                                                                                                                                                                                                                                                                          |
|----------|----------------------------------------------------------------------------------------------------------------------------------------------------------------------------------------------------------------------------------------------------------------------------------------------------------------------------------------------------------------------------------------------------------------------------------------------------------------------------------------------------------------------------------------------------------------------------------------------------------------------------------------------------------------------------------------------------------------------------------------------------------------------------------------------------------------------------------------------------------------------------------------------------------|
|          | infarctions brain" OR "Venous Brain Infarctions" OR "Anterior Cerebral Circulation Infarction" OR "brain infarction posterior circulation" OR "Posterior Circulation Brain Infarction" OR "Ischemic Stroke" OR "Ischemic Stroke" OR "carotid artery diseases" OR "carotid artery disease" OR "cerebral small vessel diseases" OR "cerebral small vessel disease" OR "intracranial artery disease" OR "cerebral arterial diseases" OR "intracranial arteriosclerosis" OR "arteriosclerosis intracranial" OR "Intracranial Atherosclerosis" OR "atherosclerosis intracranial" OR "Cerebral Arteriosclerosis" OR "arteriosclerosis cerebral" OR "Cerebral Atherosclerosis" OR "atherosclerosis cerebral" OR "intracranial embolism and thrombosis" OR "Cerebral Embolism and Thrombosis" OR "cerebral infarction" OR "cerebral ischemia" OR "cerebral ischaemia" OR "brain ischemia" OR "brain ischaemia")) |
|          | AND filter "review"                                                                                                                                                                                                                                                                                                                                                                                                                                                                                                                                                                                                                                                                                                                                                                                                                                                                                      |
| Cochrane | vegetarian or vegan or "plant based diet" or veg*                                                                                                                                                                                                                                                                                                                                                                                                                                                                                                                                                                                                                                                                                                                                                                                                                                                        |

**Table S2** Credibility assessment of the results.

The class were adapted from [5–7].

| <b>Evidence</b>                                | <b>Class I<br/>(Convincing)</b>                                       | <b>Class II<br/>(Highly<br/>suggestive)</b>                           | <b>Class III<br/>(Suggestive)</b>                                     | <b>Class<br/>IV<br/>(Weak)</b> | <b>Non-<br/>significant</b> |
|------------------------------------------------|-----------------------------------------------------------------------|-----------------------------------------------------------------------|-----------------------------------------------------------------------|--------------------------------|-----------------------------|
| <b>P-value,<br/>meta-analysis</b>              | $P < 10^{-6}$                                                         | $< 10^{-3}$                                                           | $P < 0.01$                                                            | $P \leq 0.05$                  | $P > 0.05$                  |
| <b>Number of<br/>cases</b>                     | n > 1000 (binary<br>outcome)<br>n > 20 000<br>(continuous<br>outcome) | n > 1000 (binary<br>outcome)<br>n > 20 000<br>(continuous<br>outcome) | n > 1000 (binary<br>outcome)<br>n > 20 000<br>(continuous<br>outcome) | —                              |                             |
| <b>P-value,<br/>largest study</b>              | < 0.05                                                                | < 0.05                                                                | —                                                                     | —                              |                             |
| <b>95% CI,<br/>meta-analysis</b>               | Exclude the null                                                      | —                                                                     | —                                                                     | —                              |                             |
| <b>Inconsistency<br/>score (I<sup>2</sup>)</b> | < 50%                                                                 | —                                                                     | —                                                                     | —                              |                             |
| <b>P-value,<br/>small study<br/>effects</b>    | > 0.1                                                                 | —                                                                     | —                                                                     | —                              |                             |
| <b>P-value,<br/>bias</b>                       | > 0.1                                                                 | —                                                                     | —                                                                     | —                              |                             |

**Table S3** List of excluded articles in full-text screening with reason of exclusion

| <b>Author Year</b>         | <b>DOI</b>                         | <b>Exclusion reason</b> |
|----------------------------|------------------------------------|-------------------------|
| Zyriax 2023                | 10.1016/j.maturitas.2022.09.003    | Wrong outcomes          |
| Zurbau 2020                | 10.1161/JAHA.120.017728            | Wrong outcomes          |
| Str  hle 2006              | 10.1007/s00508-006-0716-9          | Wrong study design      |
| Sofi 2012                  | 10.4081/monaldi.2012.124           | Wrong setting           |
| Shirota 2022               | 10.3390/nu14102008                 | Wrong outcomes          |
| Sherzai 2012               | 10.1111/j.1753-4887.2012.00490.x   | Wrong intervention      |
| Sanders 2014               | 10.3945/ajcn.113.071555            | Wrong outcomes          |
| Sahebkar 2023              | 10.2174/0929867331666230706102406  | Wrong outcomes          |
| Ravera 2016                | 10.3390/nu8060363                  | Wrong comparator        |
| Pearson-Stuttard 2017      | 10.3945/ajcn.116.143925            | Wrong outcomes          |
| Ovesen 2005                |                                    | Wrong study design      |
| Oussalah 2020              | 10.1016/j.clnu.2020.02.037         | Wrong study design      |
| Mente 2009                 | 10.1001/archinternmed.2009.38      | Wrong outcomes          |
| McEvoy 2012                | 10.1017/S1368980012000936          | Wrong study design      |
| Mangat 2009                | 10.3945/ajcn.2009.26736I           | Wrong outcomes          |
| Li 2015                    | 10.1017/S000711451400289X          | Wrong intervention      |
| Kontogianni 2014           | 10.1016/j.maturitas.2014.06.014    | Wrong intervention      |
| Key 2003                   | 10.1093/ajcn/78.3.533S             | Wrong study design      |
| Key 1998                   | 10.1079/phn19980006                | Wrong study design      |
| Key 1999                   | 10.1093/ajcn/70.3.516s             | Wrong study design      |
| Kaiser 2021                | 10.1093/jn/nxab037                 | Wrong outcomes          |
| Hou 2015                   |                                    | Wrong intervention      |
| Hartley 2013               | 10.1002/14651858.CD009874.pub2     | Wrong outcomes          |
| Ginter 2008                |                                    | Wrong study design      |
| Gan 2021                   | 10.3390/nu13113952                 | Wrong intervention      |
| Gan 2015                   | 10.1016/j.ijcard.2015.01.077       | Wrong intervention      |
| Eilat-Adar 2010            | 10.1016/j.numecd.2010.01.011       | Wrong outcomes          |
| Dinu 2017                  | 10.1080/10408398.2016.1138447      | Wrong study design      |
| DelRe 2022                 | 10.1007/s11883-022-00981-4         | Wrong intervention      |
| Dauchet 2005               | 10.1212/01.wnl.0000180600.09719.53 | Wrong intervention      |
| Chhabra 2023               | 10.1177/02601060221122218          | Wrong intervention      |
| Charkviani 2022            | 10.3390/clinpract13010004          | Wrong indication        |
| Chareonrungrueangchai 2020 | 10.3390/nu12041088                 | Wrong study design      |
| Bechthold 2019             | 10.1080/10408398.2017.1392288      | Wrong outcomes          |
| Aune 2019                  | 10.1093/advances/nmz042            | Wrong outcomes          |
| Aune 2018                  | 10.1093/ajcn/nqy097                | Wrong outcomes          |
| Agnoli 2023                | 10.1016/j.numecd.2023.04.005       | Wrong study design      |
| Babalola 2022              | 10.7759/cureus.29843               | Wrong outcomes          |
| Gardner 2001               | 10.1097/00019501-200111000-00005   | Wrong study design      |
| McCarty 2003               | 10.1016/S0306-9877(02)00241-4      | Wrong outcomes          |
| Mroskova 2021              | 10.32725/kont.2020.047             | Wrong intervention      |
| Roman 2019                 | 10.1016/j.neurol.2019.08.005       | Wrong outcomes          |
| Luong 2022                 | 10.1093/nutrit/nuab032             | Wrong comparator        |
| Satija 2017                | 10.1016/j.jacc.2017.05.047         | Wrong study design      |

Ocagli et al. Association of Vegetarian and Vegan Diets with Cardiovascular Health: An Umbrella Review of Meta-Analysis of Observational Studies and Randomized Trials

|                       |                                                                                                                                                                                                                                                |                          |
|-----------------------|------------------------------------------------------------------------------------------------------------------------------------------------------------------------------------------------------------------------------------------------|--------------------------|
| Garbett 2016          | 10.1016/j.nurpra.2016.04.013                                                                                                                                                                                                                   | Wrong indication         |
| doRosario 2016        | 10.1093/nutrit/nuw012                                                                                                                                                                                                                          | Wrong study design       |
| Key 2003              | 10.1093/ajcn/78.3.533s<br><a href="https://dx.doi.org/10.12688/f1000research.55220.2">https://dx.doi.org/10.12688/f1000research.55220.2</a>                                                                                                    | Wrong study design       |
| Lopes 2022            |                                                                                                                                                                                                                                                | Wrong study design       |
| Sala-Vila 2022        | <a href="https://dx.doi.org/10.1093/advances/nmac016">https://dx.doi.org/10.1093/advances/nmac016</a>                                                                                                                                          | Wrong outcomes           |
| Lin 2021              | <a href="https://dx.doi.org/10.4103/tcmj.tcmj_168_20">https://dx.doi.org/10.4103/tcmj.tcmj_168_20</a>                                                                                                                                          | Wrong outcomes           |
| Amiot-Carlin 2022     | <a href="https://dx.doi.org/10.1016/j.cnd.2022.07.002">https://dx.doi.org/10.1016/j.cnd.2022.07.002</a><br><a href="https://dx.doi.org/10.1097/CRD.0000000000000392">https://dx.doi.org/10.1097/CRD.0000000000000392</a>                       | Wrong outcomes           |
| Chrysant 2022         |                                                                                                                                                                                                                                                | Wrong indication         |
| Doundoulakis 2021     | <a href="https://dx.doi.org/10.1016/j.clnesp.2021.09.550">https://dx.doi.org/10.1016/j.clnesp.2021.09.550</a>                                                                                                                                  | Wrong study design       |
| deAquino 2020         | <a href="https://dx.doi.org/10.1007/s13670-020-00335-5">https://dx.doi.org/10.1007/s13670-020-00335-5</a>                                                                                                                                      | Wrong intervention       |
| Iguacel 2020          | <a href="https://dx.doi.org/10.1007/s00198-020-05690-9">https://dx.doi.org/10.1007/s00198-020-05690-9</a>                                                                                                                                      | Wrong indication         |
| Mukaneeva 2020        | <a href="https://dx.doi.org/10.1177/2047487320935268">https://dx.doi.org/10.1177/2047487320935268</a><br><a href="https://dx.doi.org/10.1016/j.numecd.2017.12.010">https://dx.doi.org/10.1016/j.numecd.2017.12.010</a>                         | Wrong study design       |
| Iacoviello 2018       |                                                                                                                                                                                                                                                | Wrong study design       |
| ArchundiaHerrera 2017 | <a href="https://dx.doi.org/10.1007/s13679-017-0284-5">https://dx.doi.org/10.1007/s13679-017-0284-5</a><br><a href="https://dx.doi.org/10.2174/1570161114999160719104731">https://dx.doi.org/10.2174/1570161114999160719104731</a>             | Wrong patient population |
| Panagiotakos 2016     |                                                                                                                                                                                                                                                | Wrong intervention       |
| Bazal 2016            | <a href="https://dx.doi.org/10.1093/eurheartj/ehw434">https://dx.doi.org/10.1093/eurheartj/ehw434</a>                                                                                                                                          | Wrong intervention       |
| Jacques 2015          | <a href="https://dx.doi.org/10.1017/S0007114515003141">https://dx.doi.org/10.1017/S0007114515003141</a>                                                                                                                                        | Wrong outcomes           |
| Sala-Vila 2015        | <a href="https://dx.doi.org/10.1007/s11886-015-0583-y">https://dx.doi.org/10.1007/s11886-015-0583-y</a>                                                                                                                                        | Wrong outcomes           |
| Pawlak 2015           | <a href="https://dx.doi.org/10.1016/j.amepre.2015.02.009">https://dx.doi.org/10.1016/j.amepre.2015.02.009</a><br><a href="https://dx.doi.org/10.1146/annurev-nutr-011215-025104">https://dx.doi.org/10.1146/annurev-nutr-011215-025104</a>     | Wrong intervention       |
| Shen 2015             | <a href="http://dx.doi.org/10.2174/1871529X14666140701095426">http://dx.doi.org/10.2174/1871529X14666140701095426</a><br><a href="http://dx.doi.org/10.2174/1871530314666140922153350">http://dx.doi.org/10.2174/1871530314666140922153350</a> | Wrong outcomes           |
| Casas 2014            |                                                                                                                                                                                                                                                | Wrong intervention       |
| Fields 2014           | <a href="https://dx.doi.org/10.1089/jwh.2014.4972">https://dx.doi.org/10.1089/jwh.2014.4972</a>                                                                                                                                                | Wrong study design       |
| McDermott 2014        | <a href="https://dx.doi.org/10.1136/bmj.g4906">https://dx.doi.org/10.1136/bmj.g4906</a>                                                                                                                                                        | Wrong intervention       |
| Messina 2014          | <a href="https://dx.doi.org/10.3945/ajcn.113.071472">https://dx.doi.org/10.3945/ajcn.113.071472</a>                                                                                                                                            | Wrong indication         |
| Ekmekcioglu 2014      |                                                                                                                                                                                                                                                | Wrong indication         |
| Foroughi 2013         |                                                                                                                                                                                                                                                | Wrong outcomes           |
| FrancescoSofi 2013    | <a href="https://dx.doi.org/10.1177/2047487314530052">https://dx.doi.org/10.1177/2047487314530052</a>                                                                                                                                          | Wrong outcomes           |
| Chan 2013             | <a href="https://dx.doi.org/10.1159/000354245">https://dx.doi.org/10.1159/000354245</a><br><a href="https://dx.doi.org/10.2174/1876396001205010090">https://dx.doi.org/10.2174/1876396001205010090</a>                                         | Wrong intervention       |
| Singh 2012            |                                                                                                                                                                                                                                                | Wrong study design       |
| Hankey 2012           | <a href="https://dx.doi.org/10.1016/S1474-4422%2811%2970265-4">https://dx.doi.org/10.1016/S1474-4422%2811%2970265-4</a>                                                                                                                        | Wrong intervention       |
| Hill 2011             | <a href="https://dx.doi.org/10.1007/s12170-011-0188-y">https://dx.doi.org/10.1007/s12170-011-0188-y</a>                                                                                                                                        | Wrong outcomes           |
| Rabast 2008           |                                                                                                                                                                                                                                                | Wrong study design       |
| Mead 2006             | <a href="https://dx.doi.org/10.1111/j.1365-277X.2006.00726.x">https://dx.doi.org/10.1111/j.1365-277X.2006.00726.x</a>                                                                                                                          | Wrong outcomes           |
| Miettinen 2006        | <a href="http://dx.doi.org/10.5414/CP44247">http://dx.doi.org/10.5414/CP44247</a>                                                                                                                                                              | Wrong intervention       |
| Lock 2005             |                                                                                                                                                                                                                                                | Wrong study design       |
| Woodside 2005         | <a href="https://dx.doi.org/10.1079/PNS2005464">https://dx.doi.org/10.1079/PNS2005464</a>                                                                                                                                                      | Wrong outcomes           |
| Singh 2003            | <a href="https://dx.doi.org/10.1093/ajcn/78.3.526s">https://dx.doi.org/10.1093/ajcn/78.3.526s</a>                                                                                                                                              | Wrong intervention       |



Ocagli et al. Association of Vegetarian and Vegan Diets with Cardiovascular Health: An Umbrella Review of Meta-Analysis of Observational Studies and Randomized Trials

|                          |                                                                                                     |                    |
|--------------------------|-----------------------------------------------------------------------------------------------------|--------------------|
| Dagnelie 2003            |                                                                                                     | Wrong study design |
| Knight 1996              |                                                                                                     | Wrong outcomes     |
| Nestle 1995              | <a href="http://dx.doi.org/10.1093/ajcn/61.6.1313S">http://dx.doi.org/10.1093/ajcn/61.6.1313S</a>   | Wrong intervention |
| An 2022                  | <a href="https://doi.org/10.1016/j.jacc.2022.09.048">10.1016/j.jacc.2022.09.048</a>                 | Wrong study design |
| Li 2022                  | <a href="https://doi.org/10.3389/fnut.2022.963471">10.3389/fnut.2022.963471</a>                     | Wrong intervention |
| Li 2021                  | <a href="https://doi.org/10.1016/j.foodchem.2021.130145">10.1016/j.foodchem.2021.130145</a>         | Wrong study design |
| Vernooij 2019            | <a href="https://doi.org/10.7326/M19-1583">10.7326/M19-1583</a>                                     | Wrong intervention |
| Mann 2017                | <a href="https://doi.org/10.1016/B978-0-12-803968-7.00023-X">10.1016/B978-0-12-803968-7.00023-X</a> | Wrong study design |
| Onvani 2017              | <a href="https://doi.org/10.1111/jhn.12415">10.1111/jhn.12415</a>                                   | Wrong outcomes     |
| Zhang 2015               | <a href="https://doi.org/10.3390/nu7085300">10.3390/nu7085300</a>                                   | Wrong intervention |
| RistiÄ±-MediÄ± 2014      |                                                                                                     | Wrong outcomes     |
| Berciano 2014            | <a href="https://doi.org/10.1016/j.recesp.2014.05.003">10.1016/j.recesp.2014.05.003</a>             | Wrong study design |
| Singh 2014               |                                                                                                     | Wrong study design |
| RodrÄ±guez-Monforte 2013 | <a href="https://doi.org/10.1017/S0007114515003177">10.1017/S0007114515003177</a>                   | Wrong intervention |
| Long 2010                | <a href="https://doi.org/10.1111/j.1741-6787.2009.00173.x">10.1111/j.1741-6787.2009.00173.x</a>     | Wrong outcomes     |
| Zeghichi-Hamri 2010      | <a href="https://doi.org/10.1016/j.nutres.2010.10.010">10.1016/j.nutres.2010.10.010</a>             | Wrong outcomes     |
| Pino 2009                |                                                                                                     | Wrong study design |
| Nestel 2005              |                                                                                                     | Wrong outcomes     |
| Spence 2003              |                                                                                                     | Wrong outcomes     |
| Holst 2002               |                                                                                                     | Wrong outcomes     |

**Table S4** Characteristics of included systematic reviews and meta-analyses.

| Author, year       | Study design of included studies | Diet                                      | Outcome                                         | N studies        | N participants                      | Dietary assessment method                              | Effect size | RoB tool | RoB                                                                                                                                        |
|--------------------|----------------------------------|-------------------------------------------|-------------------------------------------------|------------------|-------------------------------------|--------------------------------------------------------|-------------|----------|--------------------------------------------------------------------------------------------------------------------------------------------|
| Dinu et al. [8]    | cohort; cross-sectional          | Vegetarians                               | CVD<br>IHD                                      | 4<br>6           | 47757<br>65058                      | Questionnaire                                          | RR          | NOS      | 12 Moderate and 5 Low                                                                                                                      |
| Dybvik et al. [9]  | cohort                           | Vegetarians                               | CVD<br>IHD<br>Stroke                            | 8<br>8<br>12     | 621282<br>621282<br>770867          | FFQ                                                    | RR          | ROBINS-I | For CVD and IHD: 3 studies are moderate RoB; 5 studies are serious RoB; For stroke: 7 studies are moderate RoB; 5 studies are serious RoB; |
| Glenn et al. [10]  | cohort                           | Vegetarians                               | CHD<br>CVD mortality<br>CHD mortality<br>Stroke | 1<br>6<br>8<br>5 | 44561<br>144247<br>197737<br>122525 | FFQ at baseline                                        | RR          | NOS      | Only one cohort showed evidence of serious risk of bias                                                                                    |
| Huang et al. [11]  | cohort                           | Vegetarians                               | IHD                                             | 6                | 124706                              | FFQ at baseline                                        | RR          | NOS      | Begg's funnel plot and Begg's test showed a slight significant publication bias in ischemic heart disease and circulatory disease.         |
| Jabri et al. [12]  | cohort                           | Vegetarians                               | IHD mortality                                   | 7                | 125613                              | FFQ                                                    | RR          | ROBINS-I | Most of the included studies had a moderate risk of bias                                                                                   |
| Jafari et al. [13] | cohort                           | Highest vs lowest vegetarians consumption | CVD mortality<br>CHD mortality                  | 12<br>12         | 168294<br>508561                    | FFQ, Study dietary recall, Short general questionnaire | HR          | NOS      | Highly qualified studies received $\geq 7$ stars                                                                                           |

|                     |        |                                                |                    |    |        |                                                                                                                |    |                                                                                                  |
|---------------------|--------|------------------------------------------------|--------------------|----|--------|----------------------------------------------------------------------------------------------------------------|----|--------------------------------------------------------------------------------------------------|
| Kwok et al.<br>[14] | cohort | Vegetarians vs<br>nonvegetarians               | CVD<br>mortality   | 5  | 168294 | FFQ, 24-hour<br>dietary<br>recalls, Food<br>diaries, Self-<br>reported<br>elimination of<br>animal<br>products | RR | The risk of bias was deemed to be moderate in<br>five studies and low to moderate in two studies |
|                     |        |                                                | CHD<br>mortality   | 12 | 508561 |                                                                                                                |    |                                                                                                  |
|                     |        |                                                | IHD                | 3  | 110723 |                                                                                                                |    |                                                                                                  |
|                     |        |                                                | IHD                | 4  | 68246  |                                                                                                                |    |                                                                                                  |
|                     |        |                                                | IHD                | 4  | 68246  |                                                                                                                |    |                                                                                                  |
| Lu et al.<br>[15]   | cohort | Vegetarians                                    | Stroke             | 7  | 657433 | FFQ                                                                                                            | HR | NOS                                                                                              |
|                     |        | Vegetarians                                    | Ischemic<br>Stroke | 7  | 657433 |                                                                                                                |    |                                                                                                  |
| Quek et al.<br>[16] | cohort | Plant-based<br>dietary<br>patterns             | CVD<br>mortality   | 13 | 410085 | FFQs                                                                                                           | HR | NOS                                                                                              |
|                     |        |                                                | CVD                | 13 | 410085 |                                                                                                                |    |                                                                                                  |
|                     |        |                                                | stroke             | 13 | 410085 |                                                                                                                |    |                                                                                                  |
|                     |        | PDI, overall:<br>highest vs<br>lowest quintile | CVD<br>mortality   | 13 | 410085 |                                                                                                                |    |                                                                                                  |
|                     |        |                                                | CVD                | 13 | 410085 |                                                                                                                |    |                                                                                                  |
|                     |        |                                                | CVD<br>mortality   | 13 | 410085 |                                                                                                                |    |                                                                                                  |

Ocagli et al. Association of Vegetarian and Vegan Diets with Cardiovascular Health: An Umbrella Review of Meta-Analysis of Observational Studies and Randomized Trials

|                                                       |                  |    |        |
|-------------------------------------------------------|------------------|----|--------|
|                                                       | CVD              | 13 | 410085 |
| PDI,<br>unhealthful:<br>highest vs<br>lowest quintile | CVD<br>mortality | 13 | 410085 |
|                                                       | CVD              | 13 | 410085 |
|                                                       | CVD<br>mortality | 13 | 410085 |
| Vegetarians                                           | CVD              | 13 | 410085 |
|                                                       | stroke           | 13 | 410085 |

Abbreviations: CVD, cardiovascular disease; FFQ, food frequency questionnaire; IHD, Ischemic heart disease; HR, hazard ratio; NOS, Newcastle-Ottawa scale; PDI, Plant-based dietary Index; RR, risk ratio.

\*1 study rely exclusively on self-identification of vegetarian status

**Table S5** Credibility assessment of the results grouping by author and outcome of the meta-analysis included in the umbrella review.

| Meta-analysis   | Outcome                 | Sample Size | p-value significance | PI significance | Heterogeneity | Small study effect | Largest study significance | Class* |
|-----------------|-------------------------|-------------|----------------------|-----------------|---------------|--------------------|----------------------------|--------|
| Dinu 2016 [8]   | CVD mortality           | >1000       | >0.05                | null included   | substantial   | ns                 | Not null                   | ns     |
|                 | IHD mortality           | >1000       | >0.05                | null included   | substantial   | ns                 | Not null                   | ns     |
|                 | Cerebrovascular disease | >1000       | <0.05                | null included   | considerable  | ns                 | Null                       | IV     |
|                 | CVD incidence           | >1000       | <0.001               | < 3 studies     | only 1 study  | < 3 studies        | Not null                   | II     |
|                 | CVD mortality           | >1000       | >0.05                | < 3 studies     | only 1 study  | < 3 studies        | Null                       | ns     |
| Dybvik 2023 [9] | IHD incidence           | >1000       | <0.01                | null included   | considerable  | ns                 | Not null                   | IV     |
|                 | IHD mortality           | >1000       | <0.01                | null included   | substantial   | ns                 | Not null                   | IV     |
|                 | Stroke incidence        | >1000       | <0.001               | < 3 studies     | only 1 study  | < 3 studies        | Not null                   | III    |
|                 | Stroke mortality        | >1000       | <0.05                | null included   | low           | ns                 | Not null                   | IV     |
| Glenn 2019 [10] | CVD mortality           | >1000       | >0.05                | null included   | substantial   | ns                 | Not null                   | ns     |
|                 | IHD incidence           | >1000       | <0.001               | < 3 studies     | only 1 study  | < 3 studies        | Not null                   | II     |
|                 | IHD mortality           | >1000       | <0.05                | null included   | considerable  | ns                 | Not null                   | IV     |
|                 | Stroke mortality        | >1000       | >0.05                | null included   | considerable  | ns                 | Not null                   | ns     |
|                 | CVD mortality           | >1000       | >0.05                | < 3 studies     | substantial   | < 3 studies        | Not null                   | ns     |
| Huang 2012 [11] | IHD mortality           | >1000       | <0.001               | null included   | considerable  | ns                 | Not null                   | III    |

Ocagli et al. Association of Vegetarian and Vegan Diets with Cardiovascular Health: An Umbrella Review of Meta-Analysis of Observational Studies and Randomized Trials

| Meta-analysis    | Outcome          | Sample Size | p-value significance | PI significance | Heterogeneity | Small study effect | Largest study significance | Class* |
|------------------|------------------|-------------|----------------------|-----------------|---------------|--------------------|----------------------------|--------|
| Jabri 2021 [12]  | Stroke mortality | >1000       | <0.05                | null included   | considerable  | sig.               | Not null                   | IV     |
|                  | CVD mortality    | >1000       | <0.001               | < 3 studies     | only 1 study  | < 3 studies        | Not null                   | IV     |
|                  | IHD mortality    | >1000       | <0.001               | null included   | moderate      | ns                 | Not null                   | III    |
|                  | Stroke mortality | >1000       | >0.05                | null included   | considerable  | ns                 | Not null                   | ns     |
|                  | CVD mortality    | >1000       | >0.05                | null included   | substantial   | ns                 | Not null                   | ns     |
| Jafari 2022 [13] | IHD mortality    | >1000       | <0.001               | null included   | considerable  | ns                 | Not null                   | III    |
|                  | Stroke mortality | >1000       | <0.05                | null included   | moderate      | ns                 | Not null                   | IV     |
|                  | CVD mortality    | >1000       | >0.05                | null included   | substantial   | ns                 | Not null                   | ns     |
| Kwok 2014 [14]   | IHD mortality    | >1000       | <0.05                | null included   | substantial   | ns                 | Not null                   | IV     |
|                  | Stroke mortality | >1000       | >0.05                | null included   | substantial   | ns                 | Not null                   | ns     |
| Lu 2021 [15]     | Ischemic Stroke  | >1000       | <0.05                | null included   | moderate      | ns                 | Not null                   | IV     |
| Quek 2021 [16]   | CVD mortality    | >1000       | <0.001               | < 3 studies     | only 1 study  | < 3 studies        | Not null                   | III    |
|                  | Ischemic Stroke  | >1000       | <0.05                | < 3 studies     | moderate      | < 3 studies        | Not null                   | IV     |

**Table S6** Credibility assessment of the results grouping by outcome of the meta-analysis included in the umbrella review.

| Outcome                 | Sample Size | p-value significance | PI significance | Heterogeneity | Small study effect | Largest study significance |
|-------------------------|-------------|----------------------|-----------------|---------------|--------------------|----------------------------|
| Cerebrovascular disease | >1000       | <0.05                | Null included   | considerable  | ns                 | Not null                   |
| CVD incidence           | >1000       | <0.001               | < 3 studies     | only 1 study  | < 3 studies        | Not null                   |
| CVD mortality           | >1000       | >0.05                | Null included   | substantial   | ns                 | Null                       |
| IHD incidence           | >1000       | >0.06                | Null included   | substantial   | ns                 | Not null                   |
| IHD mortality           | >1000       | <0.001               | Null included   | substantial   | ns                 | Null                       |
| Ischemic Stroke         | >1000       | <0.05                | Null included   | considerable  | ns                 | Not null                   |
| Stroke incidence        | >1000       | <0.001               | < 3 studies     | only 1 study  | < 3 studies        | Not null                   |
| Stroke mortality        | >1000       | >0.05                | Null included   | substantial   | ns                 | Not null                   |

**Table S7** AMSTAR-2 scoring of the meta-analysis included in the umbrella systematic review

| Author, Year | Q1 | Q2* | Q3 | Q4* | Q5 | Q6 | Q7* | Q8 | Q9* | Q10 | Q11* | Q12 | Q13* | Q14 | Q15* | Q16 | AMSTAR-2       |
|--------------|----|-----|----|-----|----|----|-----|----|-----|-----|------|-----|------|-----|------|-----|----------------|
| Dinu 2016    | 1  | 1   | 1  | 1   | 0  | 1  | 1   | 0  | 1   | 0   | 1    | 1   | 0    | 1   | 1    | 1   | Low            |
| Dybvik 2023  | 1  | 1   | 1  | 1   | 1  | 1  | 1   | 1  | 1   | 1   | 1    | 1   | 1    | 1   | 1    | 1   | High           |
| Glenn 2019   | 1  | 1   | 1  | 1   | 0  | 1  | 1   | 1  | 0   | 1   | 1    | 0   | 0    | 1   | 0    | 1   | Critically low |
| Huang 2012   | 1  | 0   | 0  | 1   | 0  | 1  | 1   | 0  | 0   | 0   | 1    | 0   | 0    | 1   | 1    | 1   | Critically low |
| Jabri 2021   | 1  | 1   | 1  | 1   | 1  | 1  | 1   | 1  | 0   | 0   | 1    | 0   | 0    | 1   | 0    | 1   | Critically low |
| Jafari 2022  | 1  |     | 1  | 1   | 1  | 1  | 0   | 1  | 0   | 0   | 0    | 0   | 0    | 1   | 1    | 1   | Critically low |
| Kwok 2014    | 1  | 1   | 1  | 1   | 1  | 1  | 0   | 1  | 0   | 0   | 1    | 1   | 1    | 1   | 1    | 1   | Critically low |
| Liu 2022     | 1  | 1   | 1  | 1   | 0  | 1  | 1   | 0  | 1   | 0   | 1    | 0   | 0    | 0   | 1    | 1   | Low            |
| Lu 2021      | 1  | 1   | 1  | 1   | 1  | 1  | 0   | 0  | 1   | 1   | 1    | 1   | 1    | 0   | 1    | 1   | Moderate       |
| Quek 2021    | 1  | 1   | 1  | 1   | 1  | 1  | 1   | 0  | 1   | 0   | 1    | 1   |      | 1   | 1    | 1   | Moderate       |

\*Critical items items.

Q1. Did the research questions and inclusion criteria for the review include the components of PICO?

Q2. Did the report of the review contain an explicit statement that the review methods were established prior to the conduct of the review and did the report justify any significant deviations from the protocol?

Q3. Did the review authors explain their selection of the study designs for inclusion in the review?

Q4. Did the review authors use a comprehensive literature search strategy?

Q5. Did the review authors perform study selection in duplicate?

Q6. Did the review authors perform data extraction in duplicate?

Q7. Did the review authors provide a list of excluded studies and justify the exclusions?

Q8. Did the review authors describe the included studies in adequate detail?

Q9. Did the review authors use a satisfactory technique for assessing the risk of bias (RoB) in individual studies that were included in the review?

Q10. Did the review authors report on the sources of funding for the studies included in the review?

Q11. If meta-analysis was performed did the review authors use appropriate methods for statistical combination of results?

Q12. If meta-analysis was performed, did the review authors assess the potential impact of RoB in individual studies on the results of the meta-analysis or other evidence synthesis?

Q13. Did the review authors account for RoB in individual studies when interpreting/ discussing the results of the review?

Q14. Did the review authors provide a satisfactory explanation for, and discussion of, any heterogeneity observed in the results of the review?

Q15. If they performed quantitative synthesis did the review authors carry out an adequate investigation of publication bias (small study bias) and discuss its likely impact on the results of the review?

Q16. Did the review authors report any potential sources of conflict of interest, including any funding they received for conducting the review?



## S8 References

1. SR / MA / HTA / ITC - CINAHL Available online: <https://searchfilters.cadth.ca/link/98>.
2. SR / MA / HTA / ITC - MEDLINE, Embase, PsycInfo Available online: <https://searchfilters.cadth.ca/link/33>.
3. SR / MA / HTA / ITC - PubMed Available online: <https://searchfilters.cadth.ca/link/99>.
4. SR / MA / HTA / ITC - Scopus Available online: <https://searchfilters.cadth.ca/link/105>.
5. Bellou, V.; Belbasis, L.; Tzoulaki, I.; Evangelou, E.; Ioannidis, J.P.A. Environmental Risk Factors and Parkinson's Disease: An Umbrella Review of Meta-Analyses. *Parkinsonism Relat Disord* **2016**, *23*, 1–9, doi:10.1016/j.parkreldis.2015.12.008.
6. Dinu, M.; Pagliai, G.; Casini, A.; Sofi, F. Mediterranean Diet and Multiple Health Outcomes: An Umbrella Review of Meta-Analyses of Observational Studies and Randomised Trials. *Eur J Clin Nutr* **2018**, *72*, 30–43, doi:10.1038/ejcn.2017.58.
7. Oussalah, A.; Levy, J.; Berthezène, C.; Alpers, D.H.; Guéant, J.-L. Health Outcomes Associated with Vegetarian Diets: An Umbrella Review of Systematic Reviews and Meta-Analyses. *Clinical Nutrition* **2020**, *39*, 3283–3307, doi:10.1016/j.clnu.2020.02.037.
8. Dinu M.; Pagliai G.; Casini A.; Sofi F. Vegetarian, Vegan Diets and Multiple Health Outcomes: A Systematic Review with Meta-Analysis of Observational Studies. *European Heart Journal* **2016**, *37*, 549, doi:10.1093/eurheartj/ehw432.
9. Dybvik JS; Svendsen M; Aune D Vegetarian and Vegan Diets and the Risk of Cardiovascular Disease, Ischemic Heart Disease and Stroke: A Systematic Review and Meta-Analysis of Prospective Cohort Studies. *Eur J Nutr* **2023**, *62*, 51–69, doi:10.1007/s00394-022-02942-8.
10. Glenn AJ; Vigiouliouk E; Seider M; Boucher BA; Khan TA; Blanco Mejia S; Jenkins DJA; Kahleová H; Rahelić D; Salas-Salvadó J; et al. Relation of Vegetarian Dietary Patterns With Major Cardiovascular Outcomes: A Systematic Review and Meta-Analysis of Prospective Cohort Studies. *Front Nutr* **2019**, *6*, 80, doi:10.3389/fnut.2019.00080.
11. Huang T; Yang B; Zheng J; Li G; Wahlqvist ML; Li D Cardiovascular Disease Mortality and Cancer Incidence in Vegetarians: A Meta-Analysis and Systematic Review. *Ann Nutr Metab* **2012**, *60*, 233–240, doi:10.1159/000337301.
12. Jabri A; Kumar A; Verghese E; Alameh A; Khan MS; Khan SU; Michos ED; Kapadia SR; Reed GW; Kalra A Meta-Analysis of Effect of Vegetarian Diet on Ischemic Heart Disease and All-Cause Mortality. *Am J Prev Cardiol* **2021**, *7*, 100182, doi:10.1016/j.ajpc.2021.100182.
13. Jafari S; Hezaveh E; Jalilpiran Y; Jayedi A; Wong A; Safaiyan A; Barzegar A Plant-Based Diets and Risk of Disease Mortality: A Systematic Review and Meta-Analysis of Cohort Studies. *Crit Rev Food Sci Nutr* **2022**, *62*, 7760–7772, doi:10.1080/10408398.2021.1918628.
14. Kwok CS; Umar S; Myint PK; Mamas MA; Loke YK Vegetarian Diet, Seventh Day Adventists and Risk of Cardiovascular Mortality: A Systematic Review and Meta-Analysis. *Int J Cardiol* **2014**, *176*, 680–686, doi:10.1016/j.ijcard.2014.07.080.
15. Lu JW; Yu LH; Tu YK; Cheng HY; Chen LY; Loh CH; Chen TL Risk of Incident Stroke among Vegetarians Compared to Nonvegetarians: A Systematic Review and Meta-Analysis of Prospective Cohort Studies. *Nutrients* **2021**, *13*, doi:10.3390/nu13093019.
16. Quek J; Lim G; Lim WH; Ng CH; So WZ; Toh J; Pan XH; Chin YH; Muthiah MD; Chan SP; et al. The Association of Plant-Based Diet With Cardiovascular Disease and Mortality: A Meta-Analysis and Systematic Review of Prospect Cohort Studies. *Front Cardiovasc Med* **2021**, *8*, 756810, doi:10.3389/fcvm.2021.756810.
